# Supplementary material
Source: publisher figshare collection journal article supplement (https://gsapubs.figshare.com/ndownloader/files/22744166)
Supplement: Supplementary file 1 [file 22744166]

Figure 1: Whole-mantle cross-sections through S20RTS. The blue line on the globe indicates the surface projection of the cross-section. Its center and azimuth (clockwise from north at the center) are indicated in the lower-right corner. Circles on this line and ticks on the cross-section are  $30^\circ$  apart. In regions colored red (blue) the shear velocity is lower (higher) than the average shear velocity at that depth. To bring out the relatively weak, shear velocity variations in the mid-mantle, the total variation in shear velocity is 3%. However, lateral velocity variations in the uppermost mantle are much stronger. Triangles indicate the locations of hotspots from the catalog of Sleep (1990). Cross-sections are through Afar at angles of a)  $30^\circ$ , b)  $60^\circ$ , c)  $90^\circ$ , and d)  $120^\circ$ .

Figure 2: As Figure 1 except cross-sections through Easter island.

Figure 3: As Figure 1 except cross-sections through Galapagos.

Figure 4: As Figure 1 except cross-sections through Hawaii (see also Walker et al., this volume).

Figure 5: As Figure 1 except cross-sections through Hoggar (see also Liégeois et al., this volume).

Figure 6: As Figure 1 except cross-sections through Iceland (see also Björnsson et al., this volume; Clift, this volume; DeLaughter et al., this volume; Foulger et al., this volume; King, this volume; Lundin and Doré, this volume).

Figure 7: As Figure 1 except cross-sections through Kerguelen.

Figure 8: As Figure 1 except cross-sections through Louisville.

Figure 9: As Figure 1 except cross-sections through Reunion.

Figure 10: As Figure 1 except cross-sections through Samoa.

Figure 11: As Figure 1 except cross-sections through Tristan da Cunha (see also Bailey and Woolley, this volume; Fairhead and Wilson, this volume; Vogt and Jung, this volume).

Figure 12: As Figure 1 except cross-sections through Yellowstone (see also Jordan, this volume).

## REFERENCES CITED

- Bailey, D.K., and Woolley, A.R., this volume, Repeated, synchronous magmatism within Africa: Timing, magnetic reversals and global tectonics, *in* Foulger, G.R., et al., eds., Plates, plumes, and paradigms: Geological Society of America Special Paper 388, p. 365–377.
- Björnsson, A., Eysteinnsson, H., and Beblo, M., this volume, Crustal formation and magma genesis beneath Iceland: magnetotelluric constraints, *in* Foulger, G.R., et al., eds., Plates, plumes, and paradigms: Geological Society of America Special Paper 388, p. 665–686.
- Clift, P.D., this volume, Sedimentary evidence for moderate mantle temperature anomalies associated with hotspot volcanism, *in* Foulger, G.R., et al., eds., Plates, plumes, and paradigms: Geological Society of America Special Paper 388, p. 279–287.
- DeLaughter, J., Stein, C.A., and Stein, S., this volume, Hotspots: A view from the swells, *in* Foulger, G.R., et al., eds., Plates, plumes, and paradigms: Geological Society of America Special Paper 388, p. 257–278.
- Fairhead, M.J., and Wilson, M., this volume, Plate tectonic processes in the south Atlantic ocean: Do we need deep mantle plumes, *in* Foulger, G.R., et al., eds., Plates, plumes, and paradigms: Geological Society of America Special Paper 388, p. 537–553.
- Foulger, G.R., Natland, J.H., and Anderson, D.L., this volume, Genesis of the Iceland Melt Anomaly by Plate Tectonic Processes, *in* Foulger, G.R., et al., eds., Plates, plumes, and paradigms: Geological Society of America Special Paper 388, p. 595–625.
- Jordan, B.T., this volume, Age-progressive volcanism of the Oregon High Lava Plains: Overview and evaluation, *in* Foulger, G.R., et al., eds., Plates, plumes, and paradigms: Geological Society of America Special Paper 388, p. 503–515.
- King, S.D., this volume, North Atlantic topographic and geoid anomalies: the result of a narrow ocean basin and cratonic roots?, *in* Foulger, G.R., et al., eds., Plates, plumes, and paradigms: Geological Society of America Special Paper 388, p. 653–664.
- Liégeois, J.-P., Benhallou, A., Azzouni-Sekkal, A., Yahiaoui, R., and Bonin, B., this volume, The Hoggar swell and volcanism: Reactivation of the Precambrian Tuareg shield during Alpine convergence and West African Cenozoic volcanism, *in* Foulger, G.R., et al., eds., Plates, plumes, and paradigms: Geological Society of America Special Paper 388, p. 379–400.
- Lundin, E., and Doré, T., this volume, The fixity of the Iceland "hotspot" on the Mid-Atlantic Ridge: Observational evidence, mechanisms and implications for Atlantic volcanic margins, *in* Foulger, G.R., et al., eds., Plates, plumes, and paradigms: Geological Society of America Special Paper 388, p. 627–651.
- Vogt, P.R., and Jung, W.-Y., this volume, Paired basement ridges: Spreading axis migration across mantle heterogeneities?, *in* Foulger, G.R., et al., eds., Plates, plumes, and paradigms: Geological Society of America Special Paper 388, p. 555–579.
- Walker, K.T., Bokelmann, G.H.R., Klemperer, S.L., G., and Nyblade, A., this volume, Shear-wave splitting around hotspots: Evidence for upwelling-related mantle flow?, *in* Foulger, G.R., et al., eds., Plates, plumes, and paradigms: Geological Society of America Special Paper 388, p. 171–192.

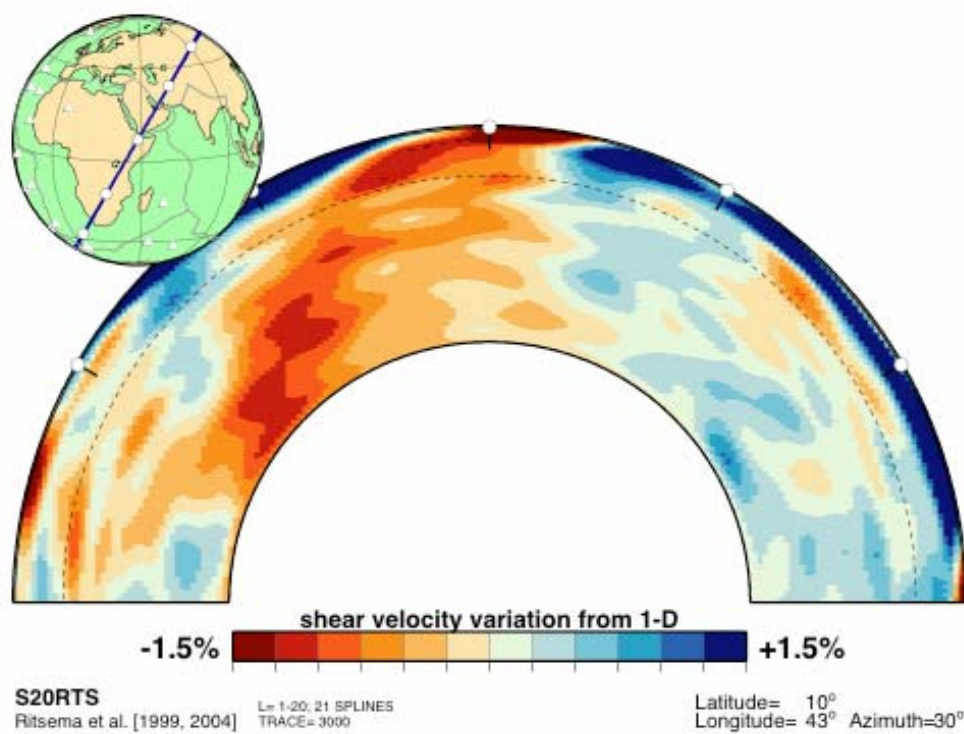

Figure 1a

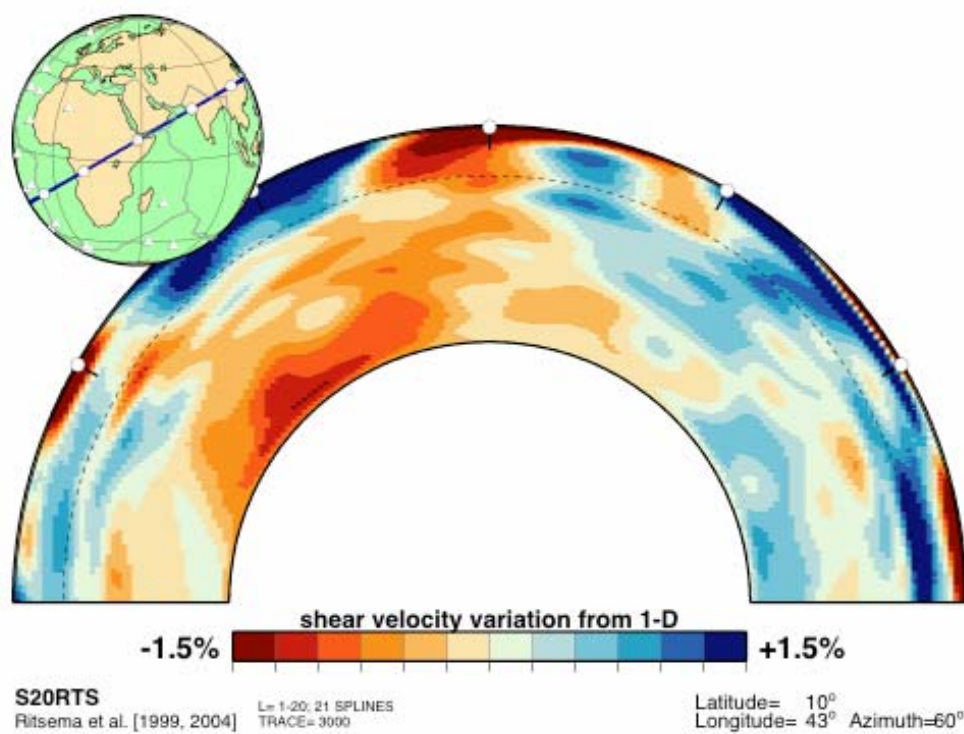

Figure 1b

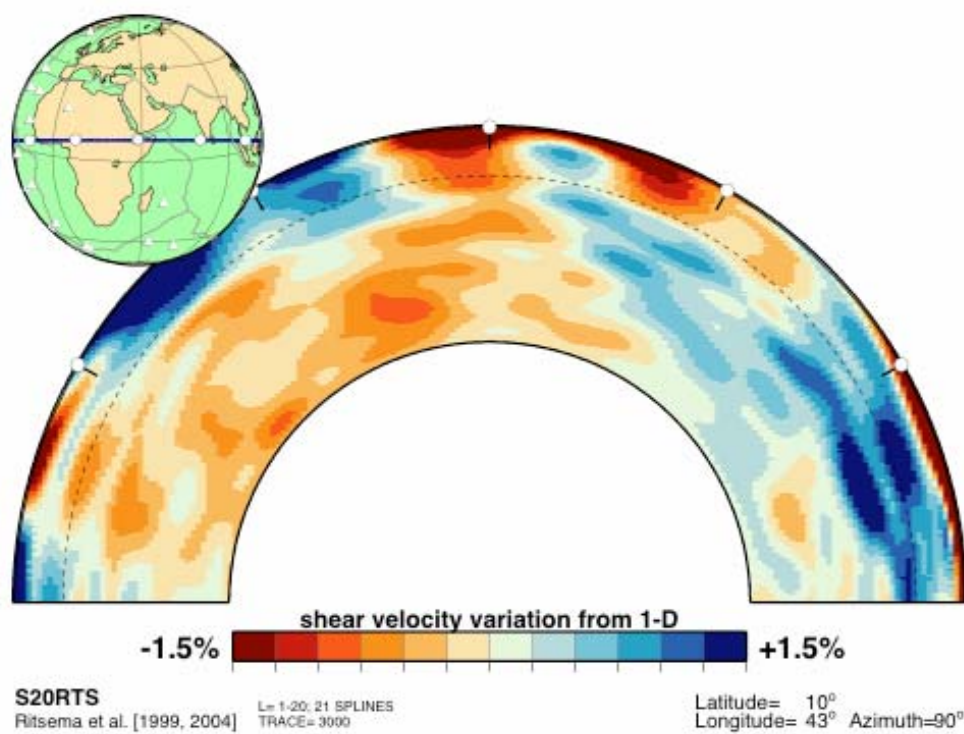

Figure 1c

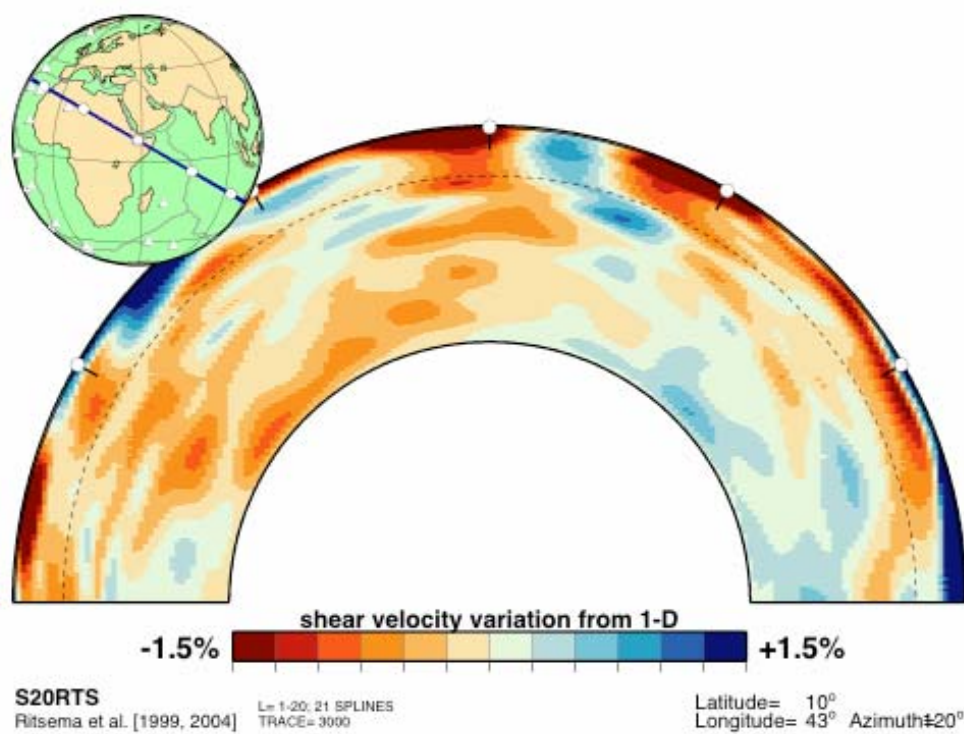

Figure 1d

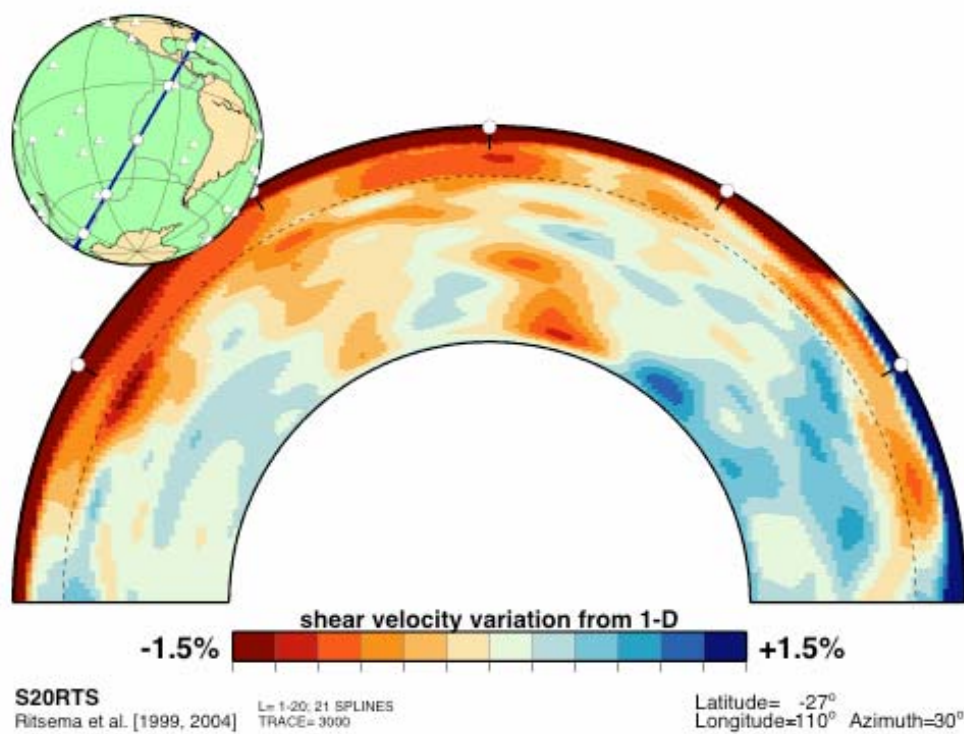

Figure 2a

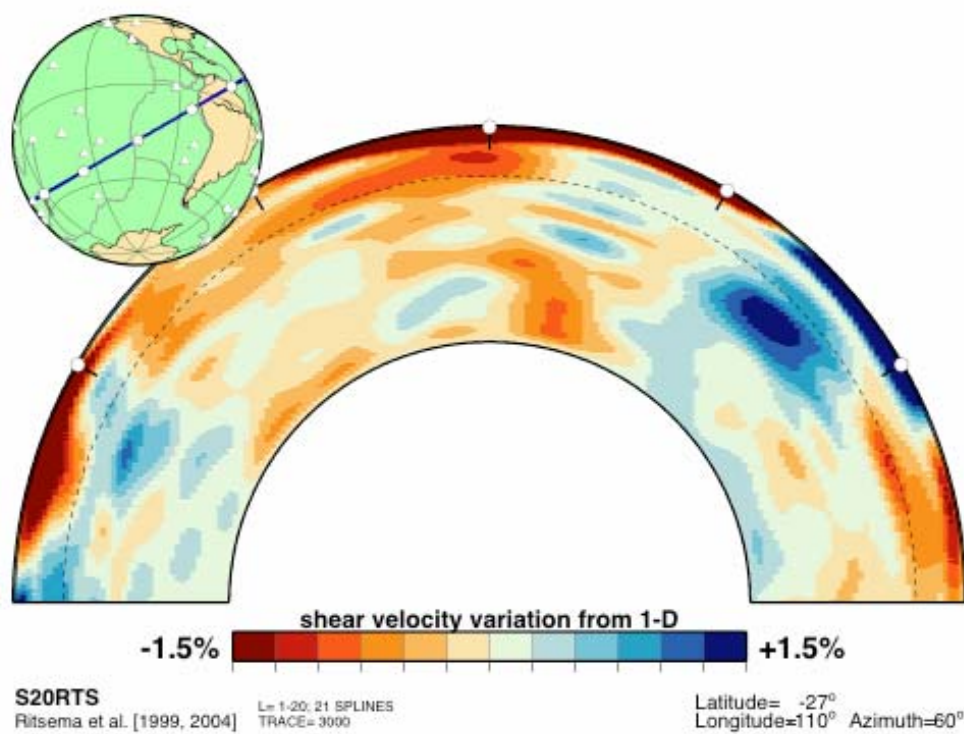

Figure 2b



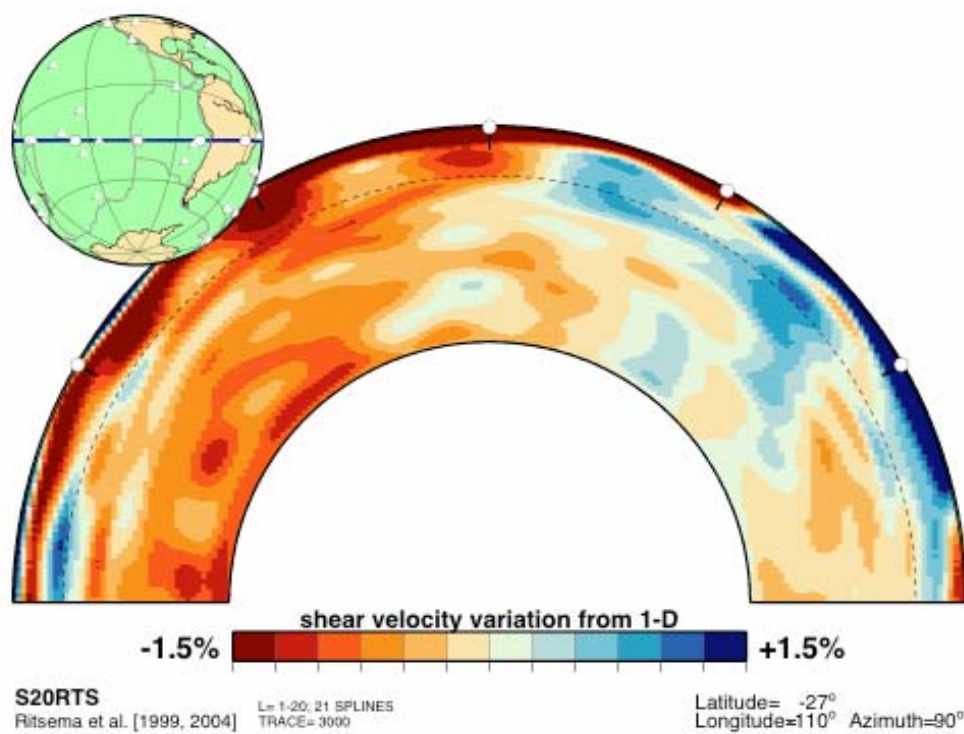

Figure 2c

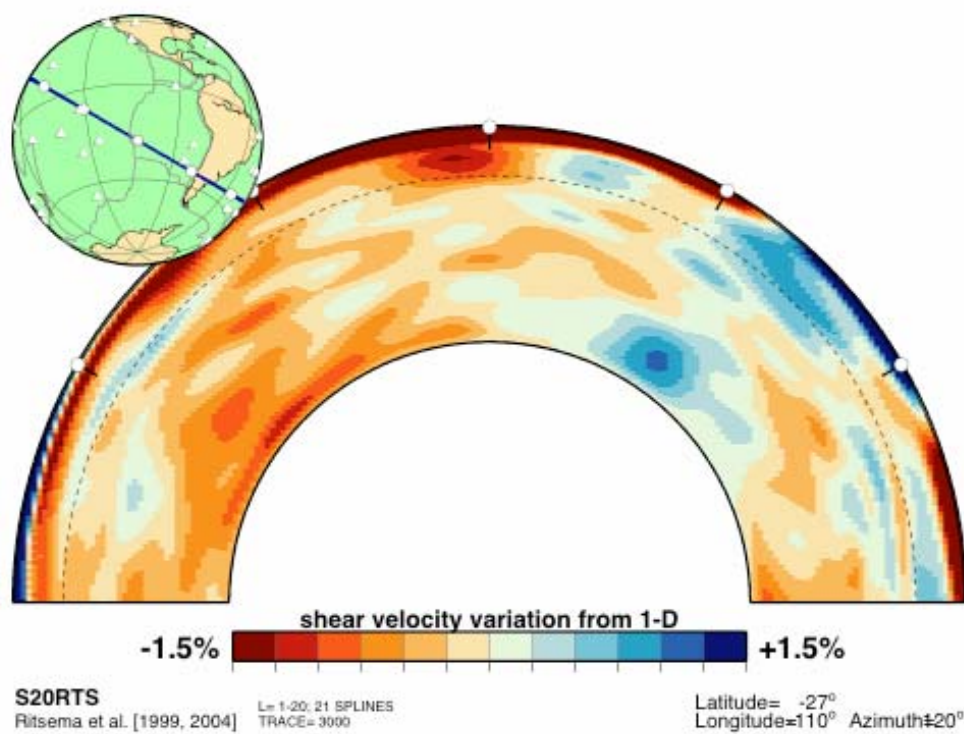

Figure 2d

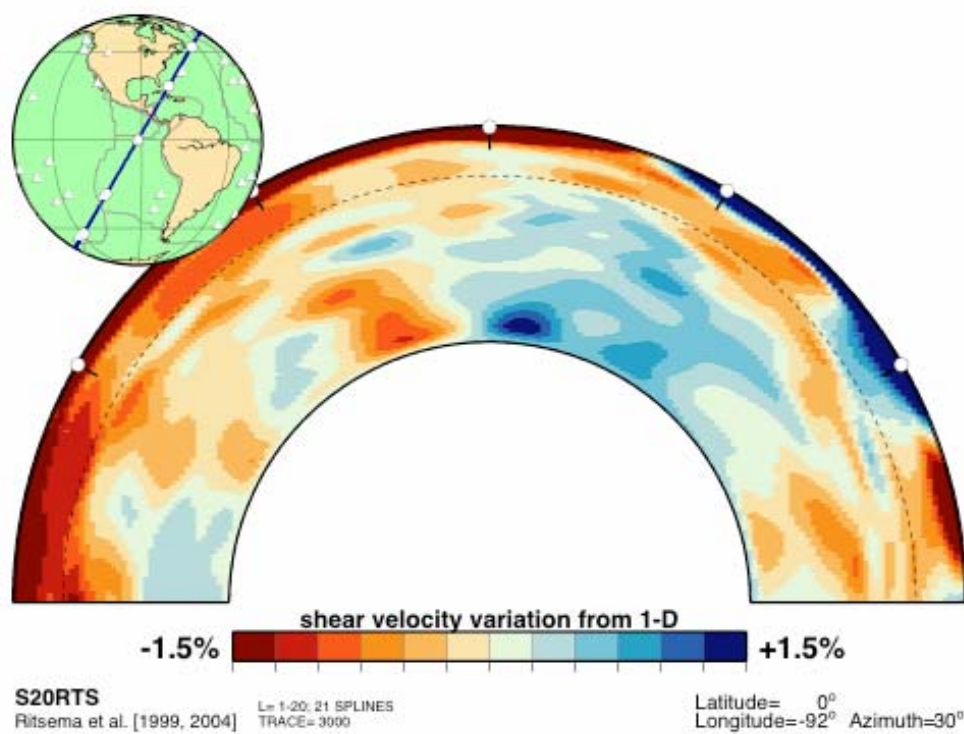

Figure 3a

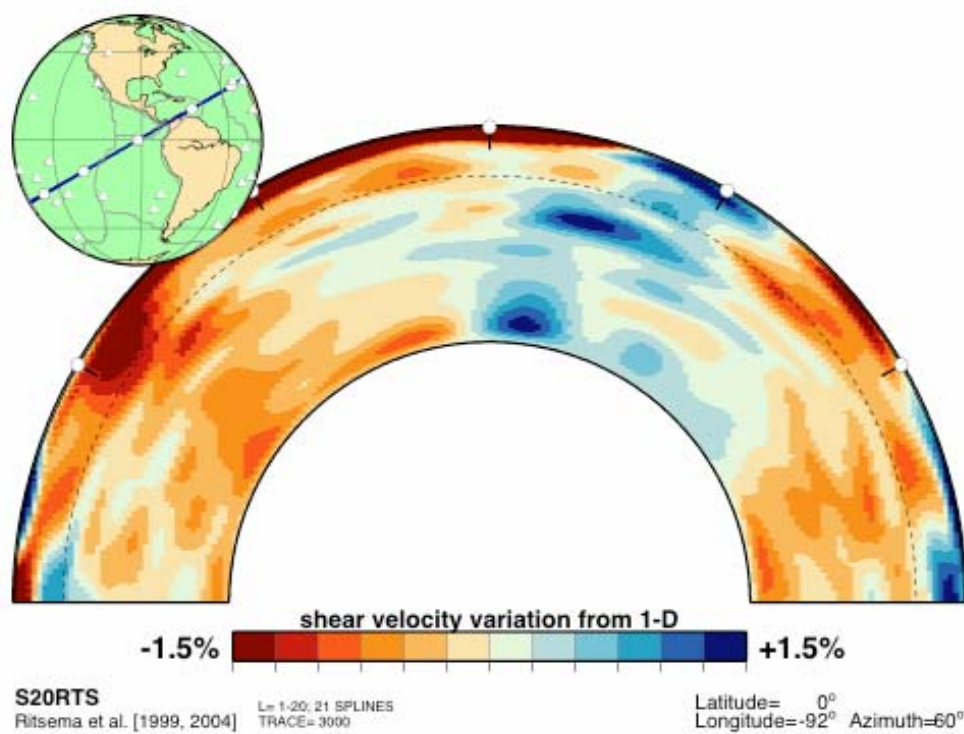

Figure 3b

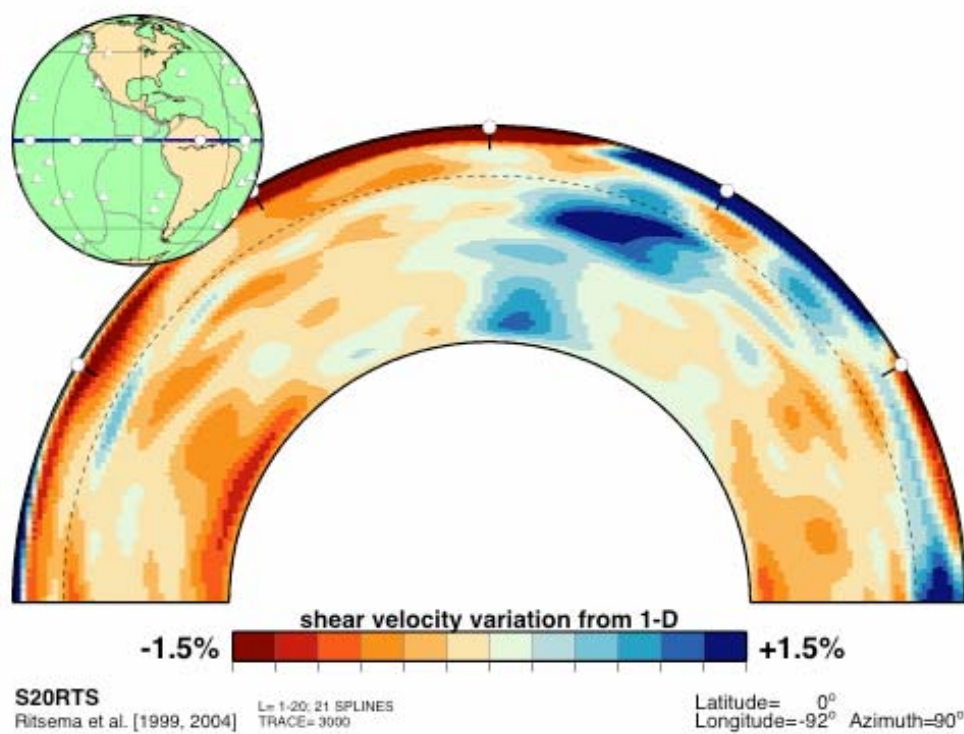

Figure 3c

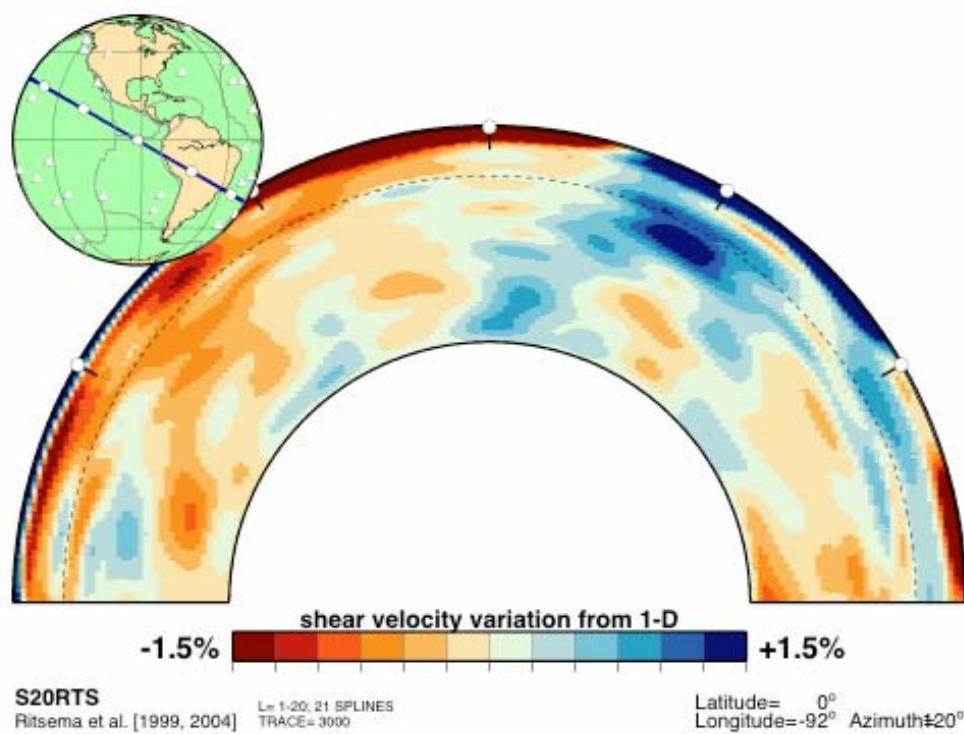

Figure 3d

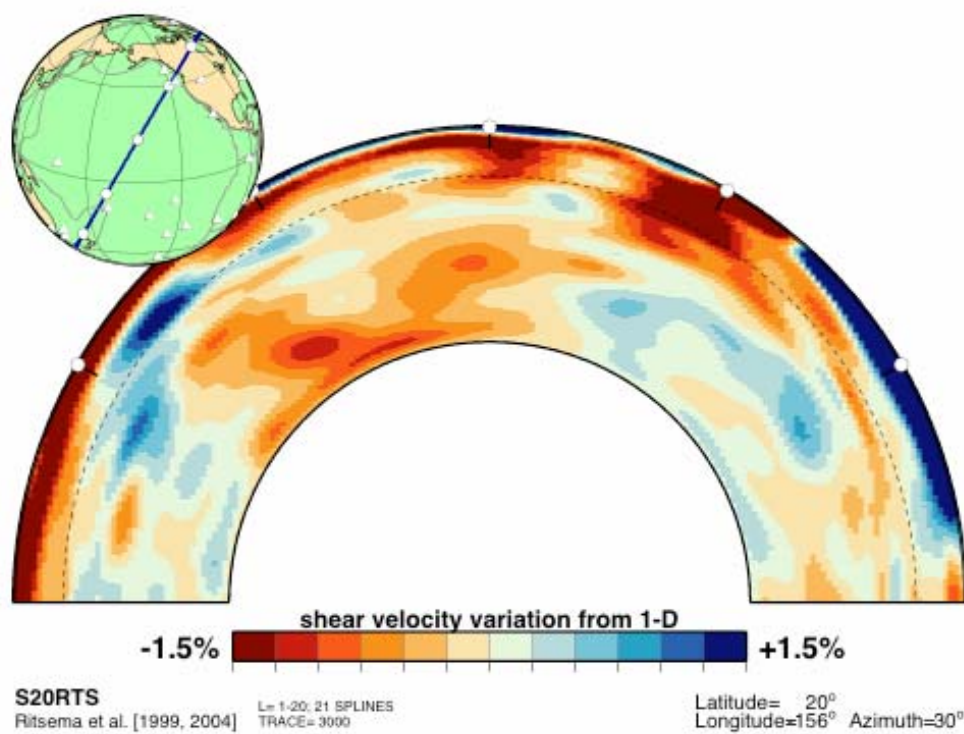

Figure 4a



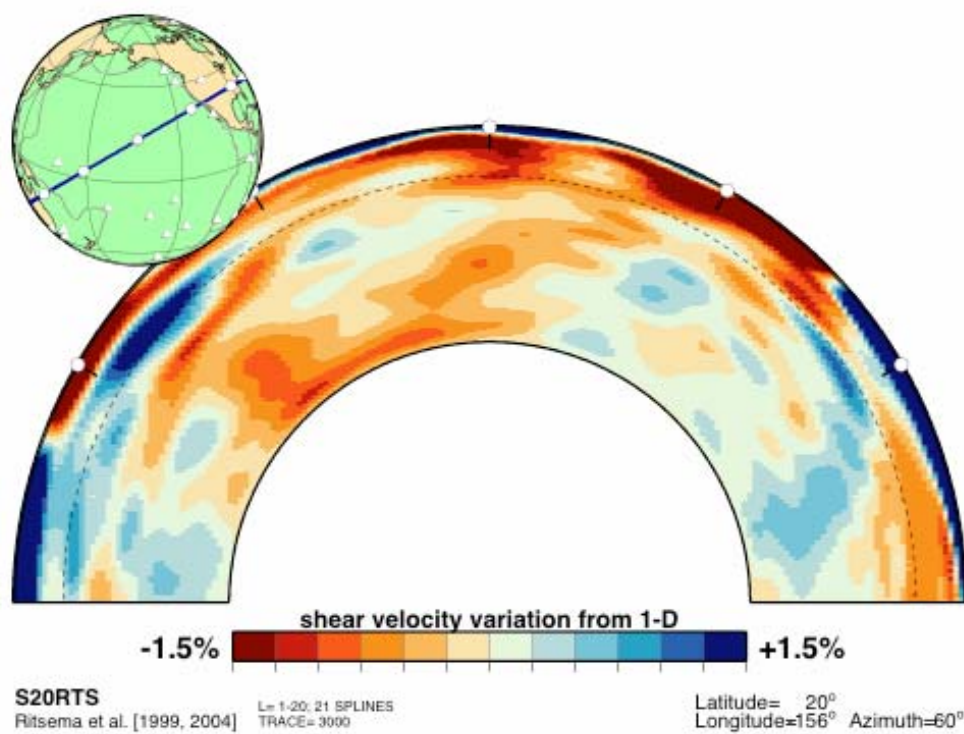

Figure 4b



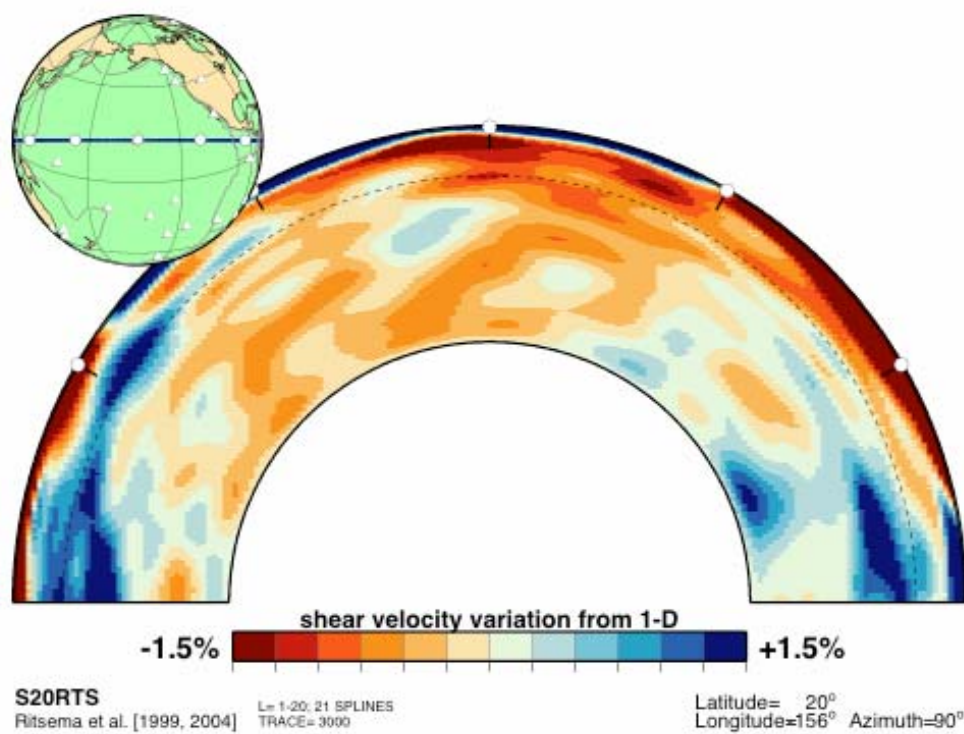

Figure 4c

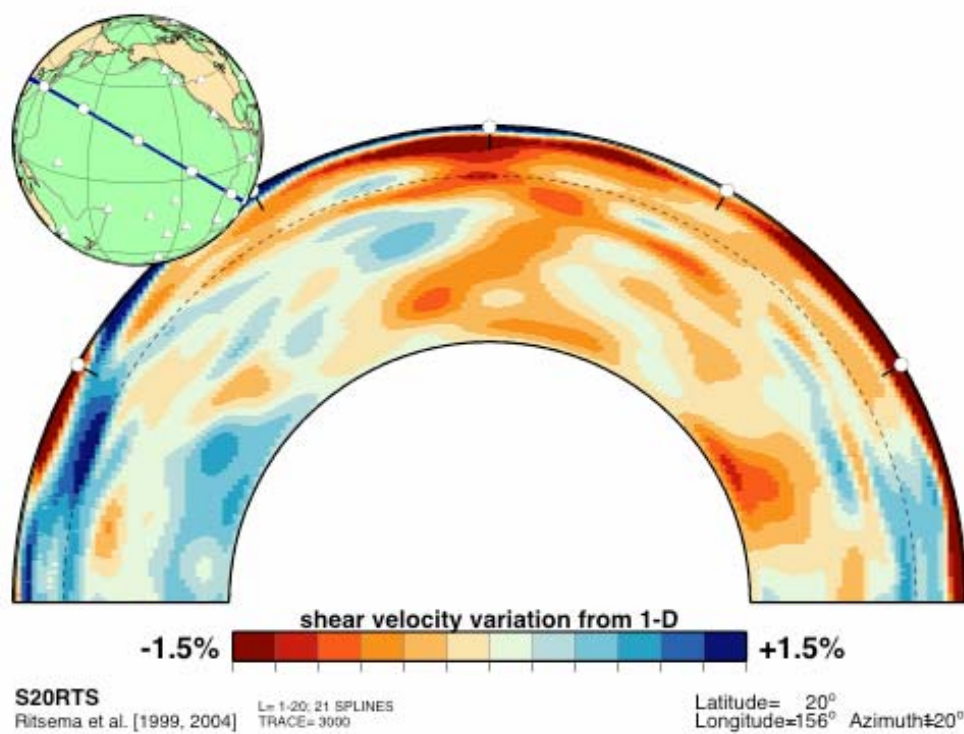

Figure 4d

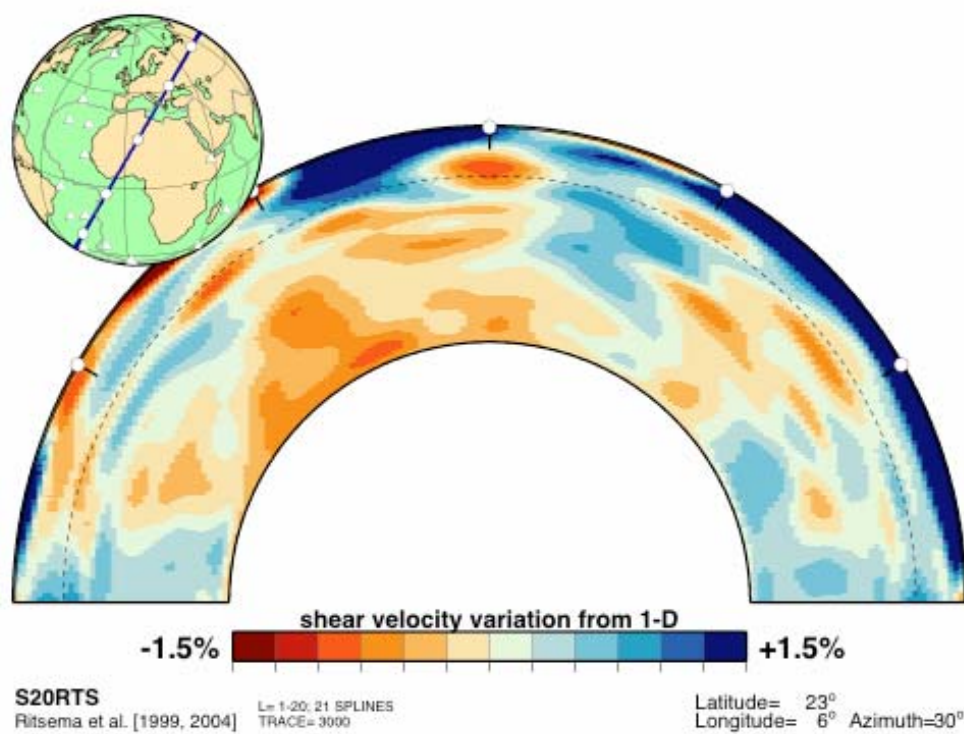

Figure 5a

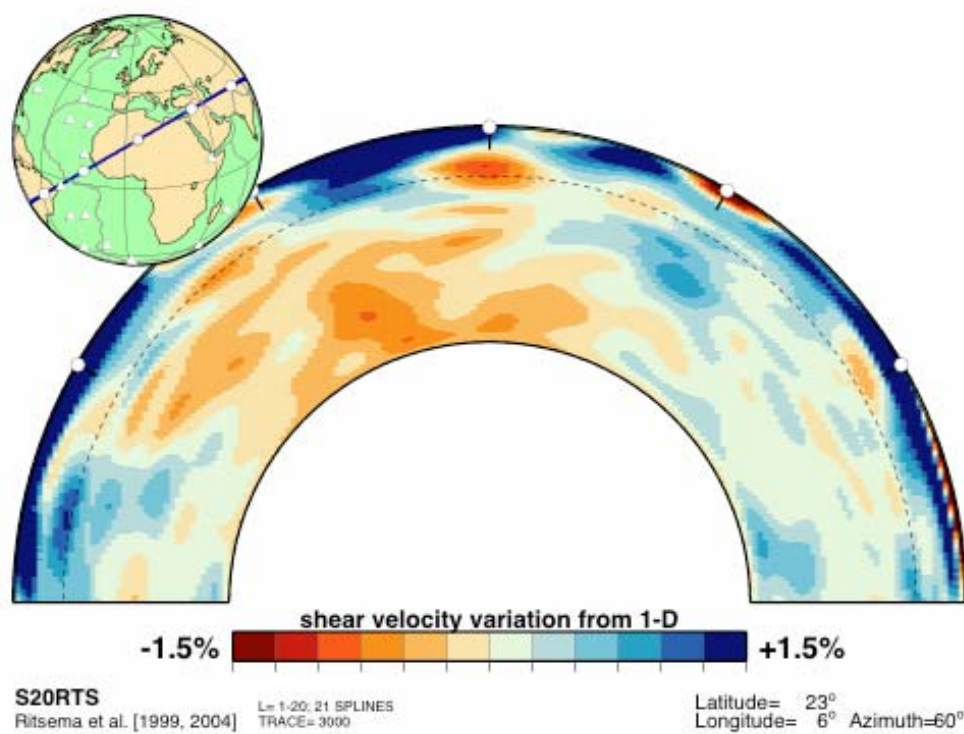

Figure 5b

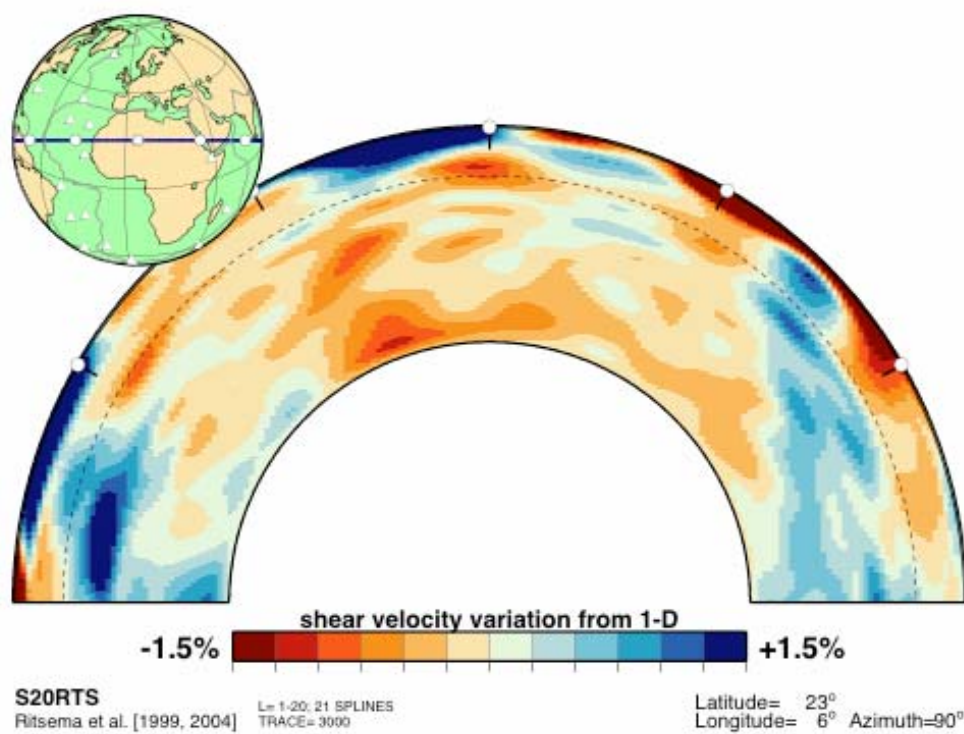

Figure 5c

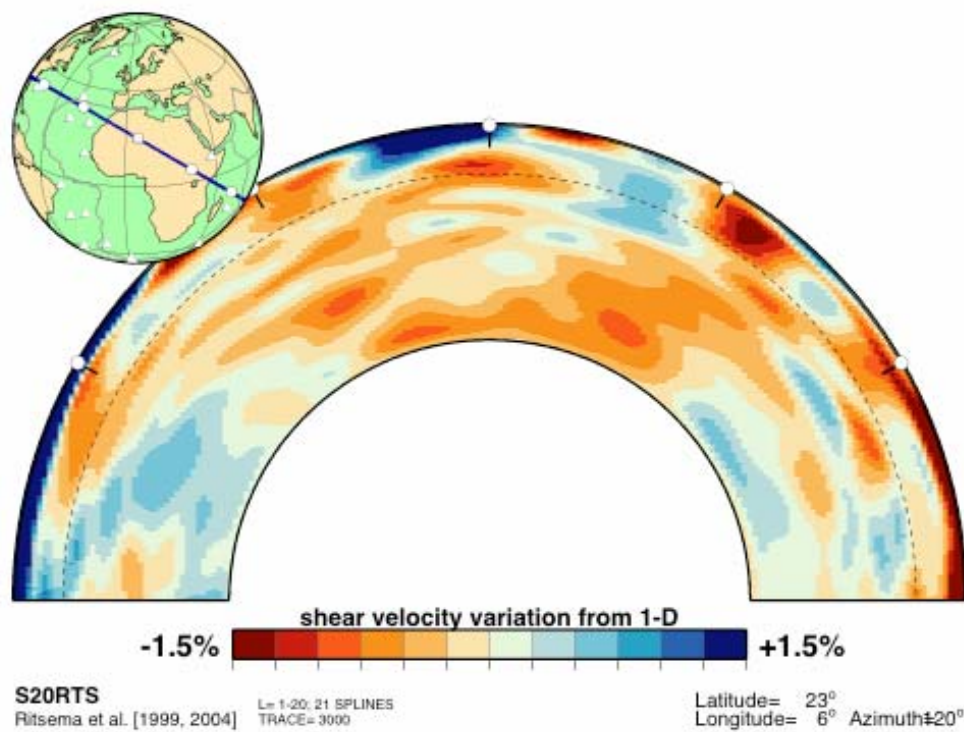

Figure 5d

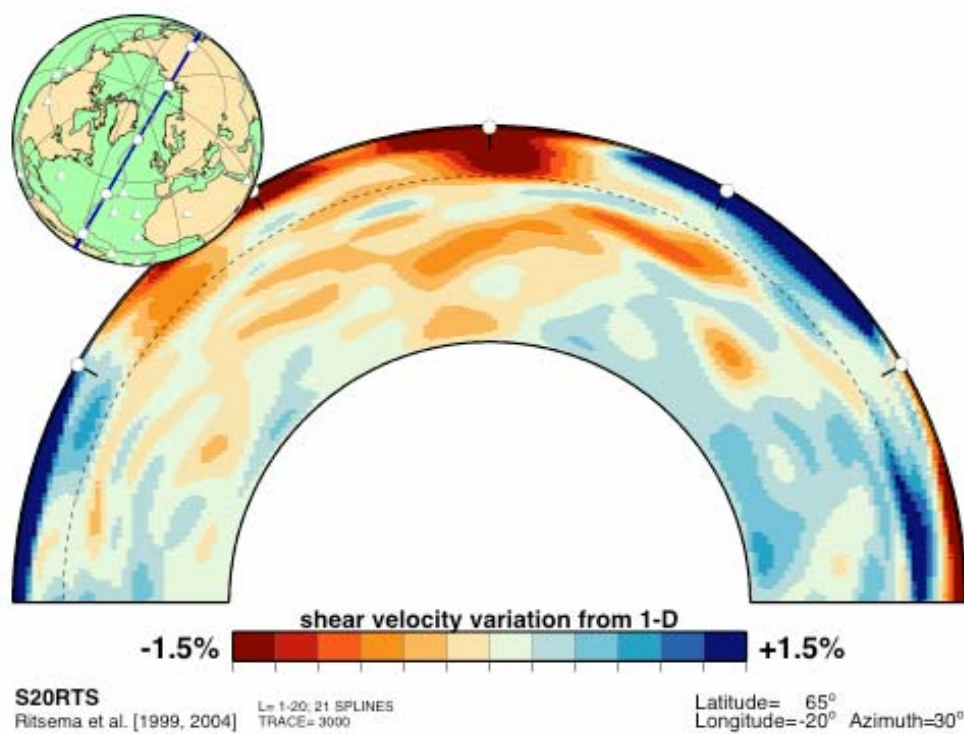

Figure 6a



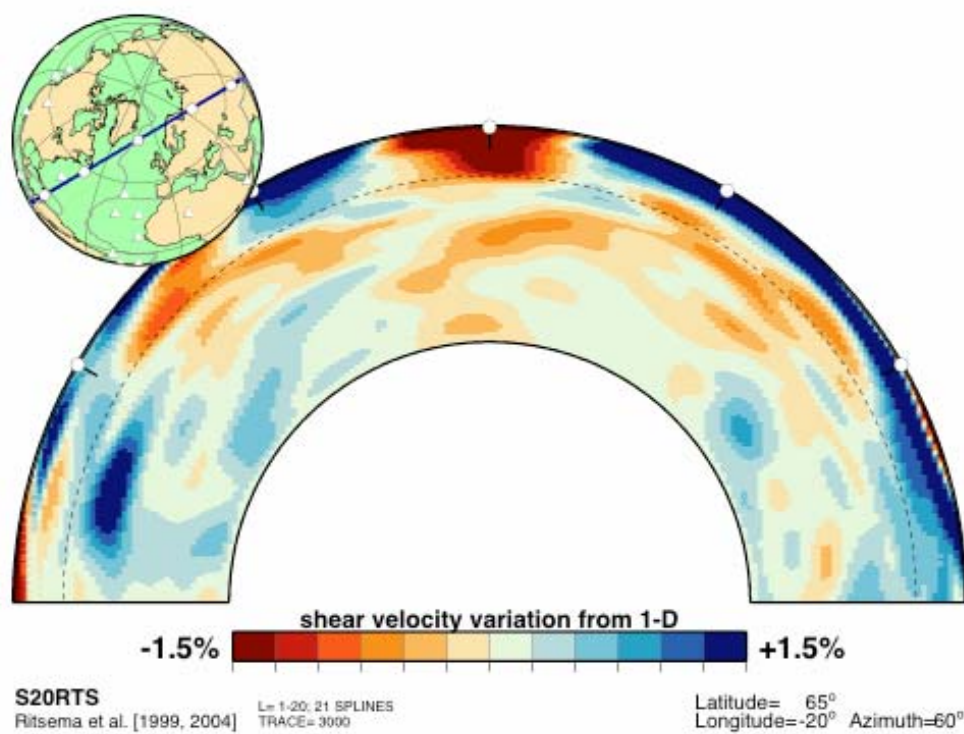

Figure 6b



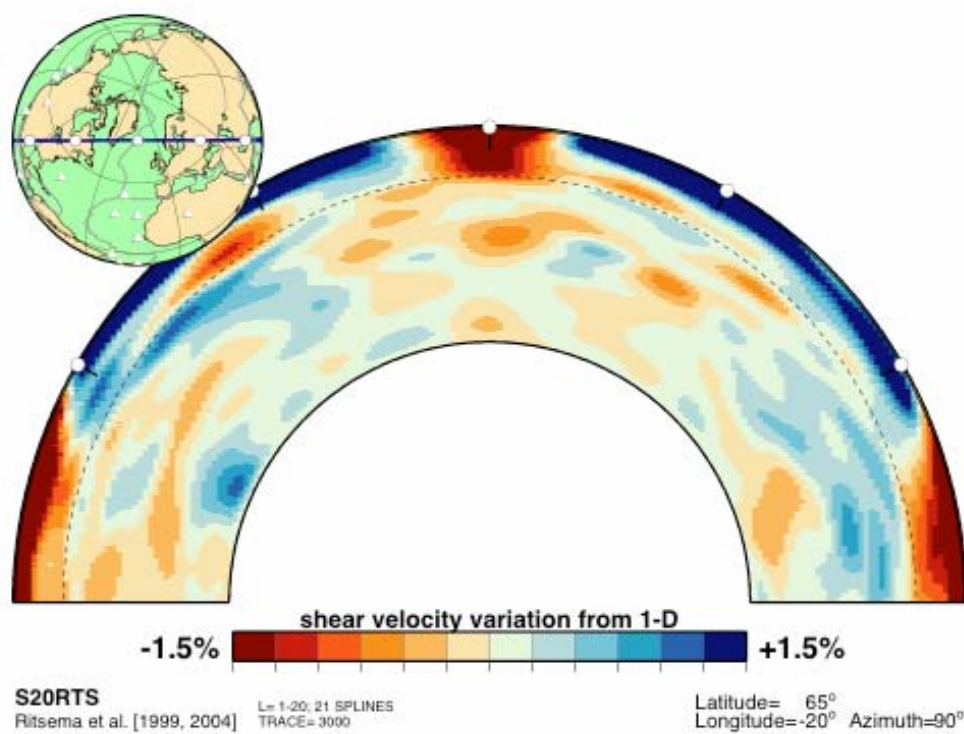

Figure 6c

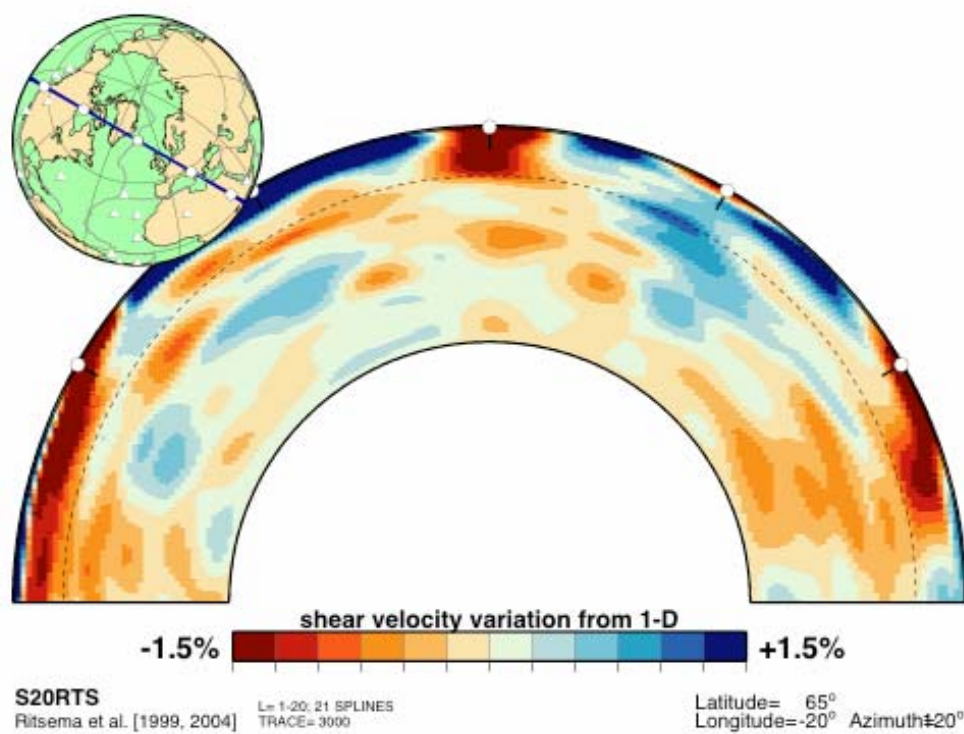

Figure 6d

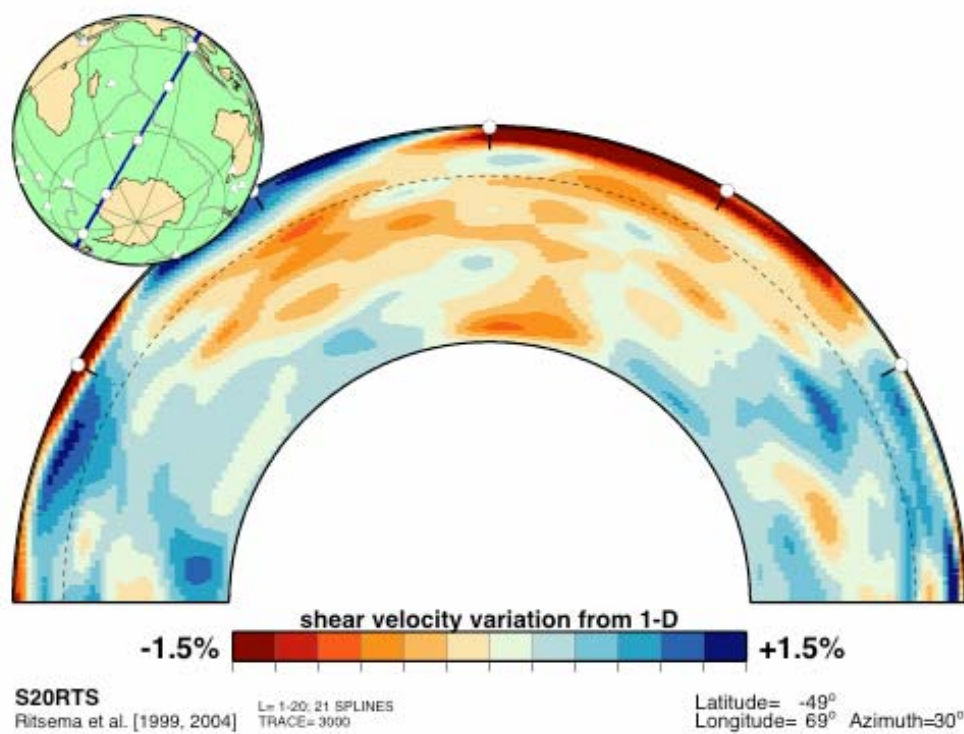

Figure 7a

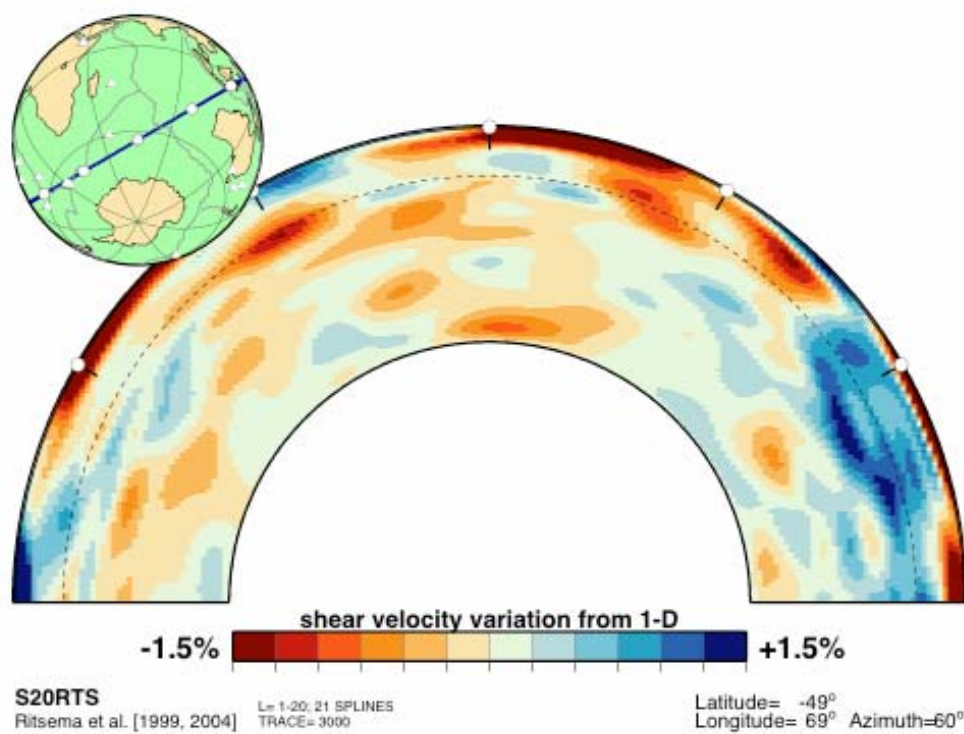

Figure 7b

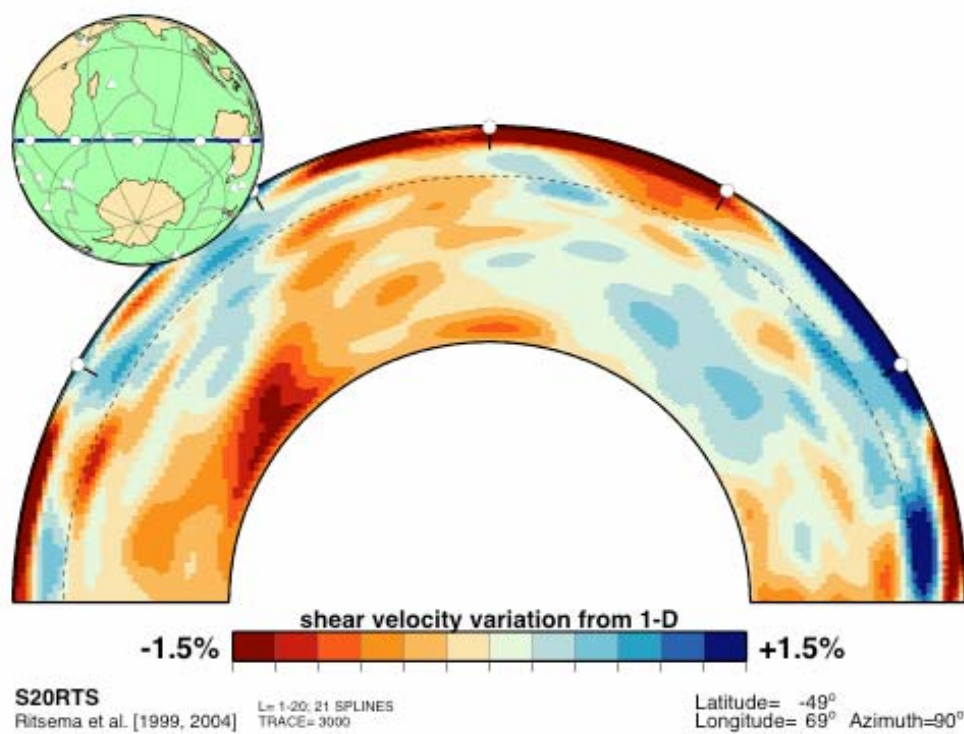

Figure 7c

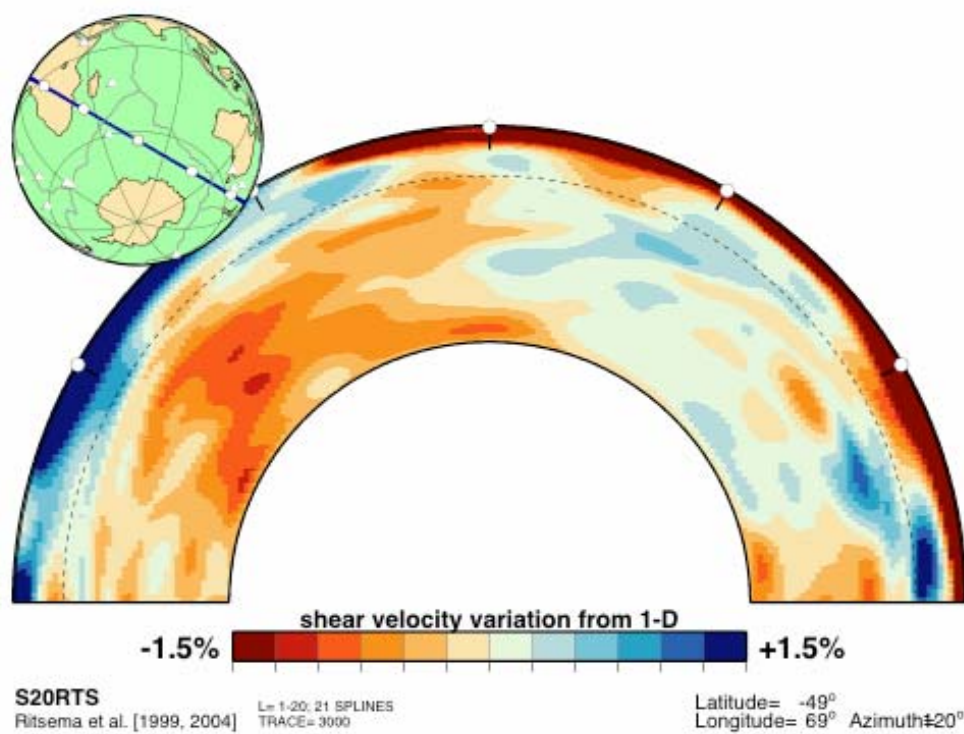

Figure 7d

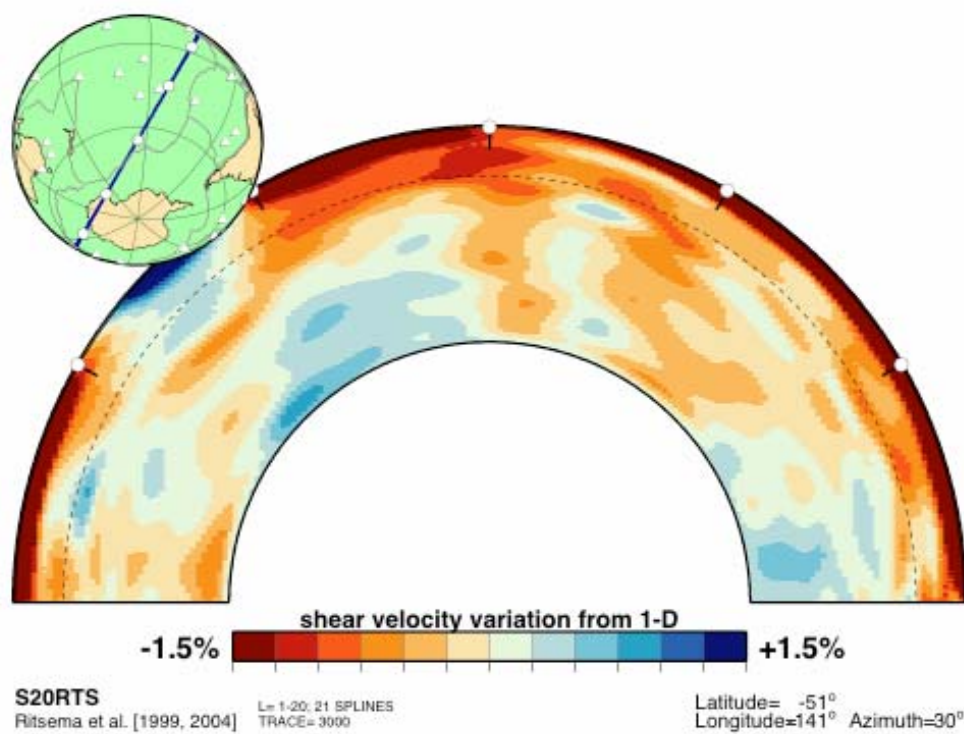

Figure 8a



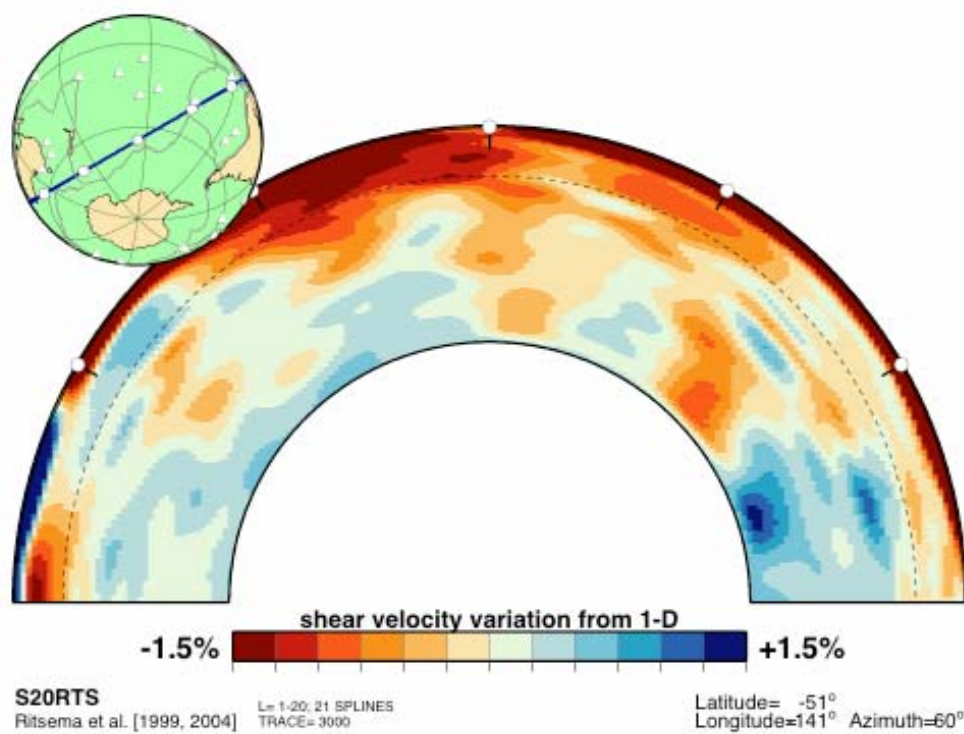

Figure 8b



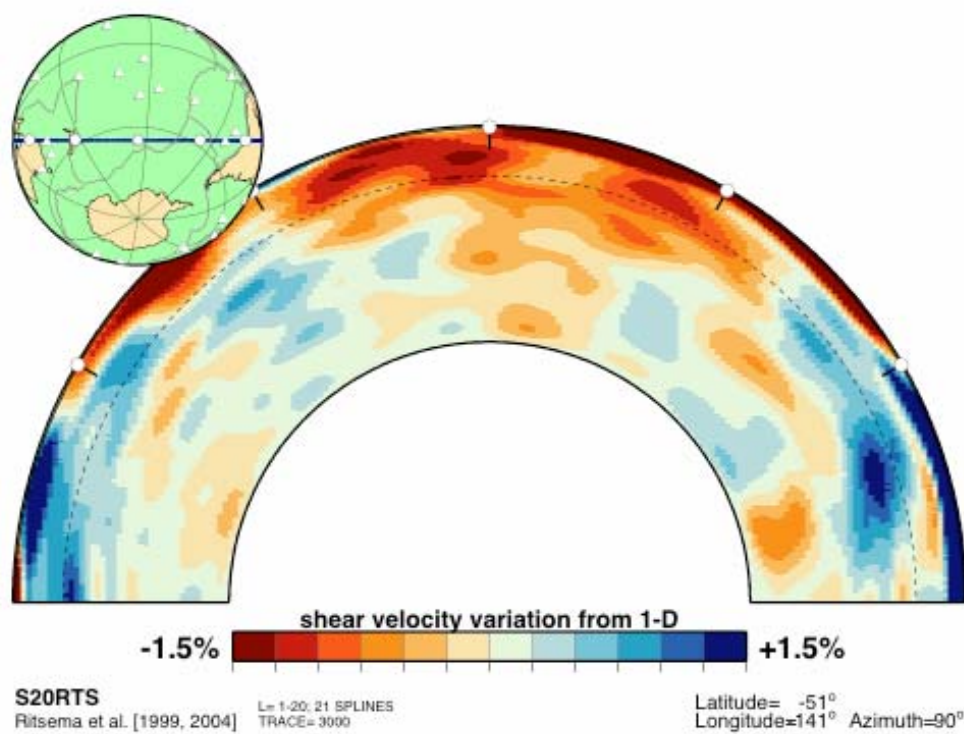

Figure 8c

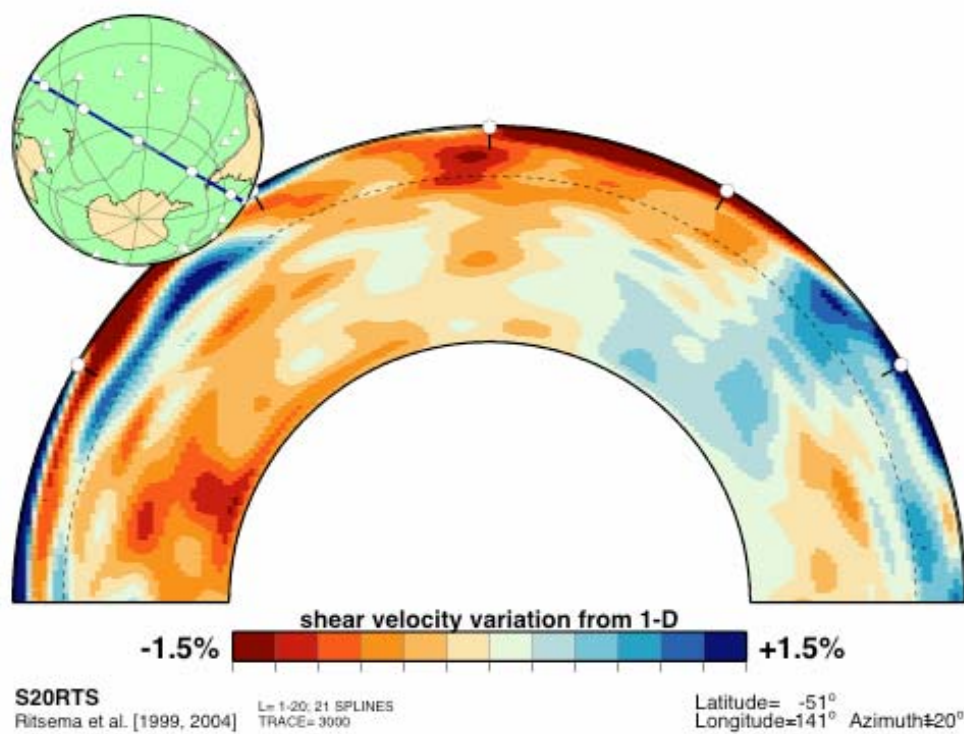

Figure 8d

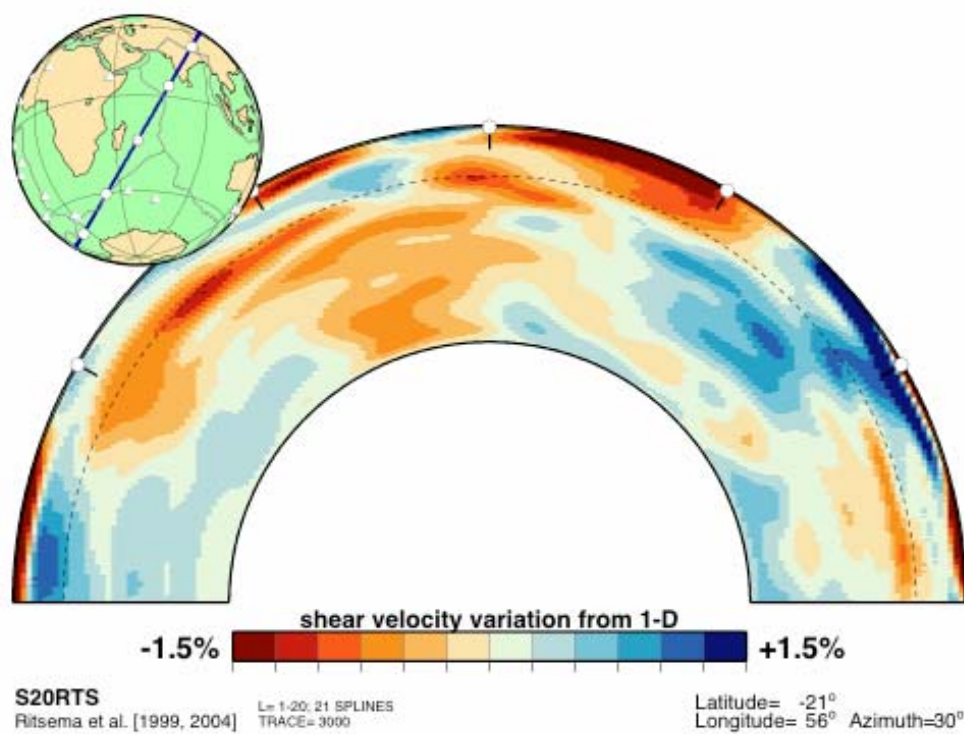

Figure 9a

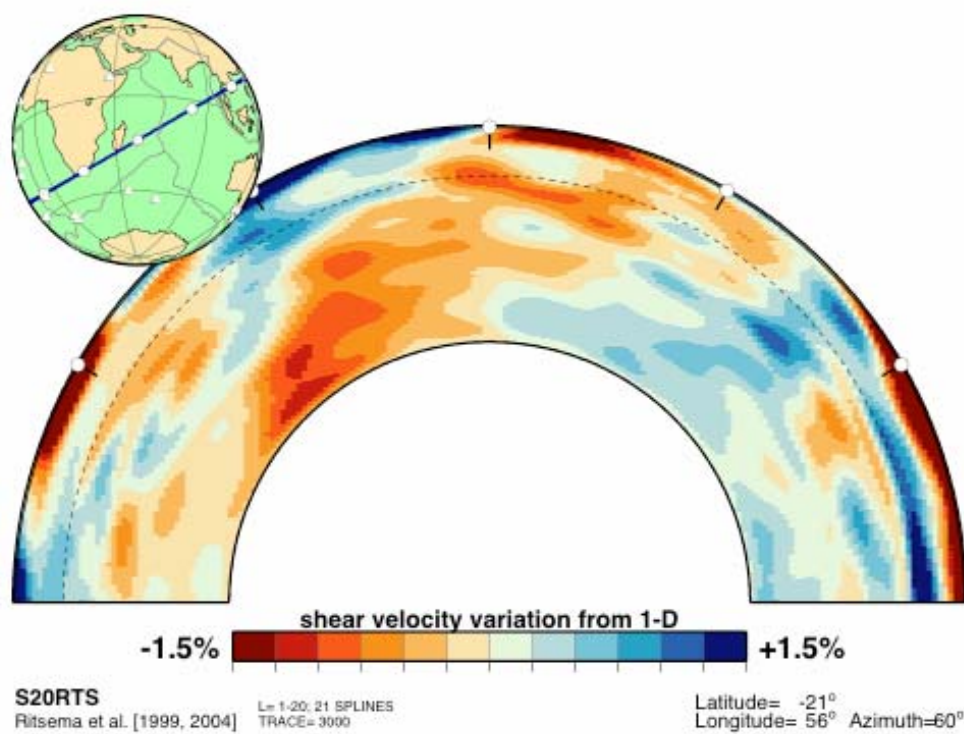

Figure 9b

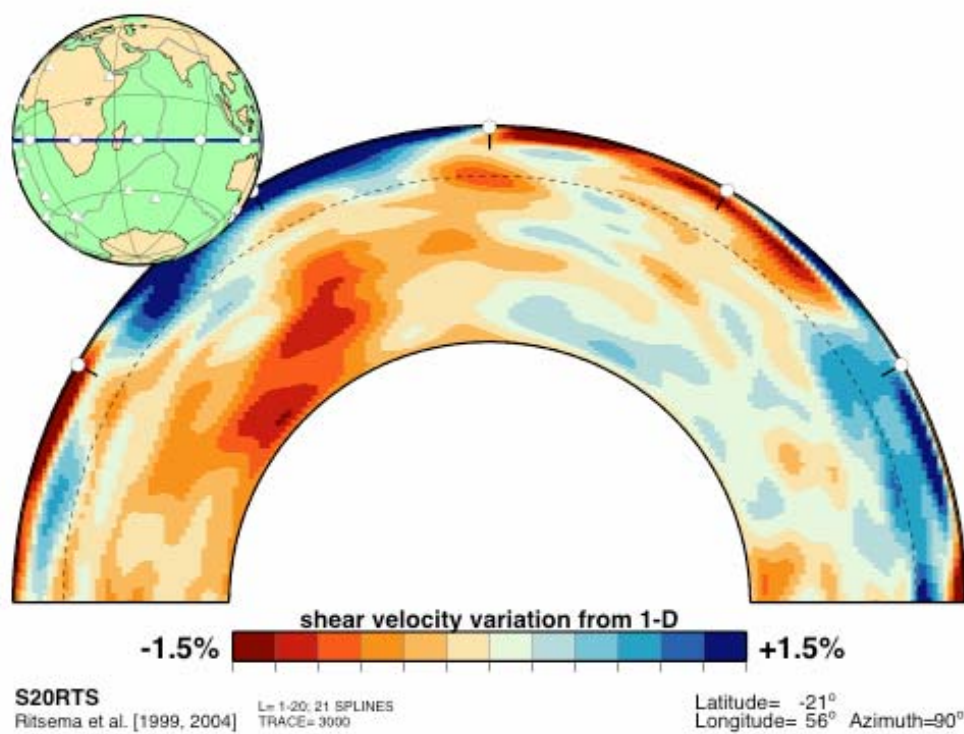

Figure 9c

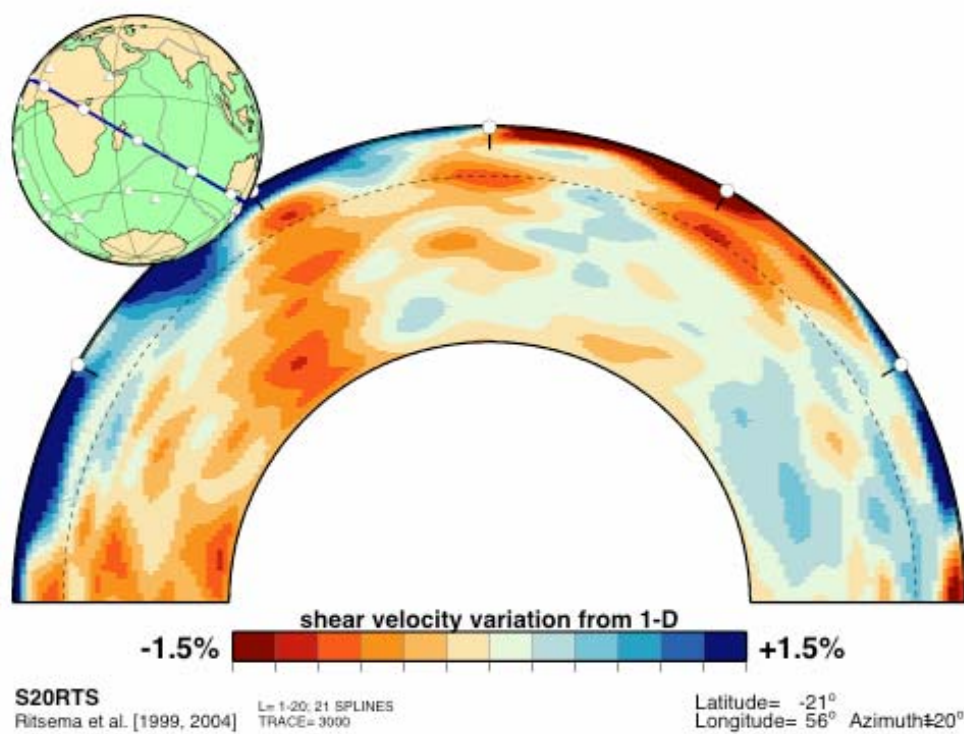

Figure 9d

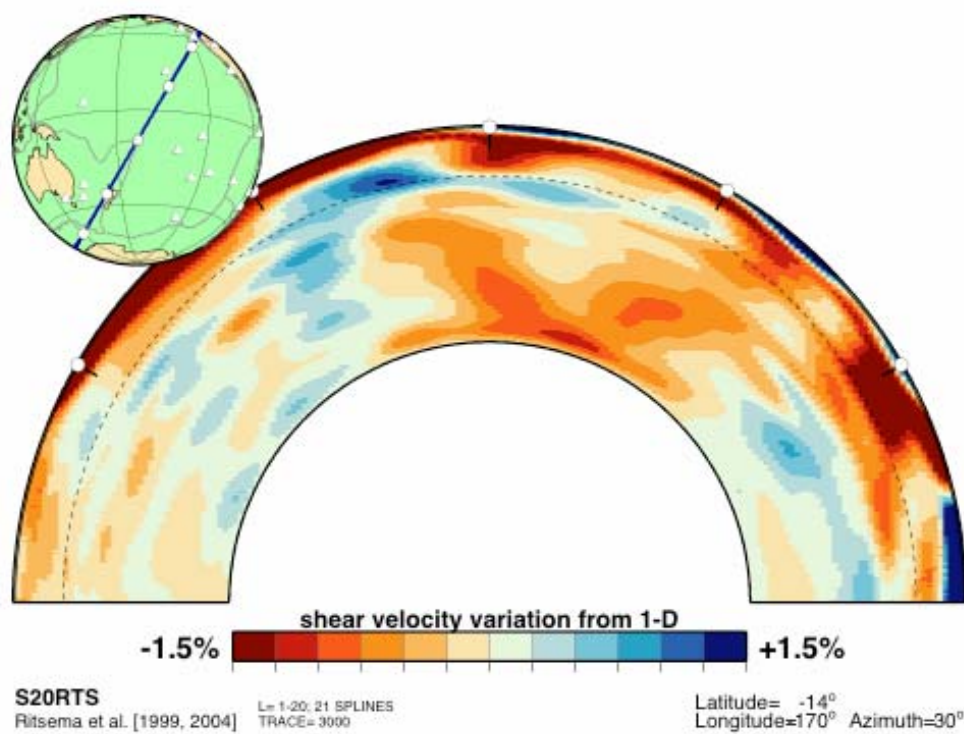

Figure 10a



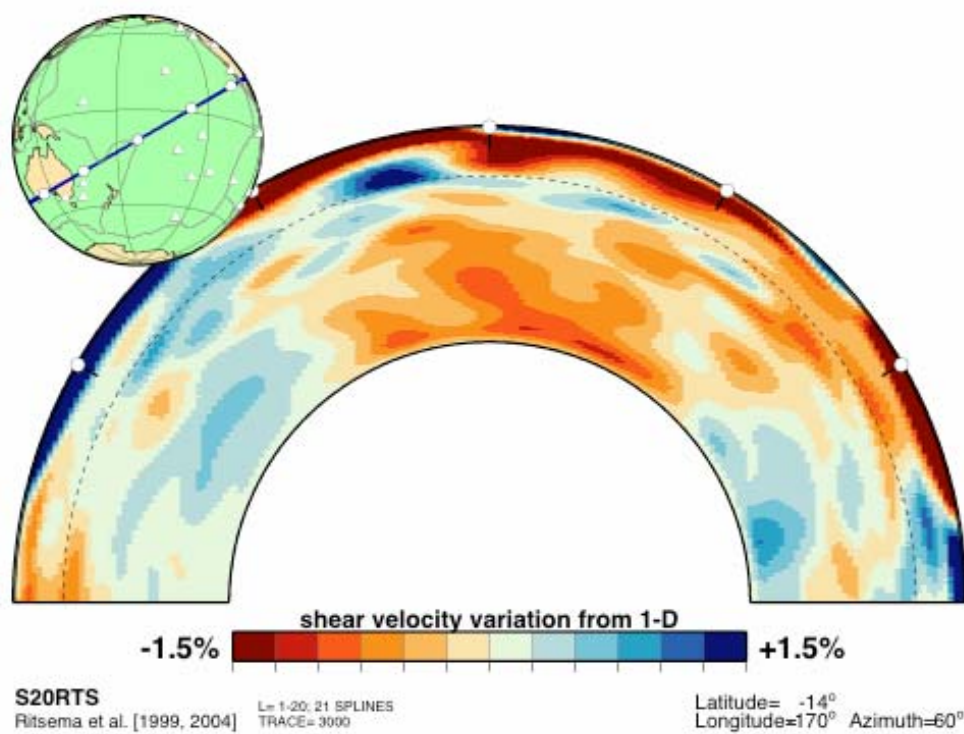

Figure 10b

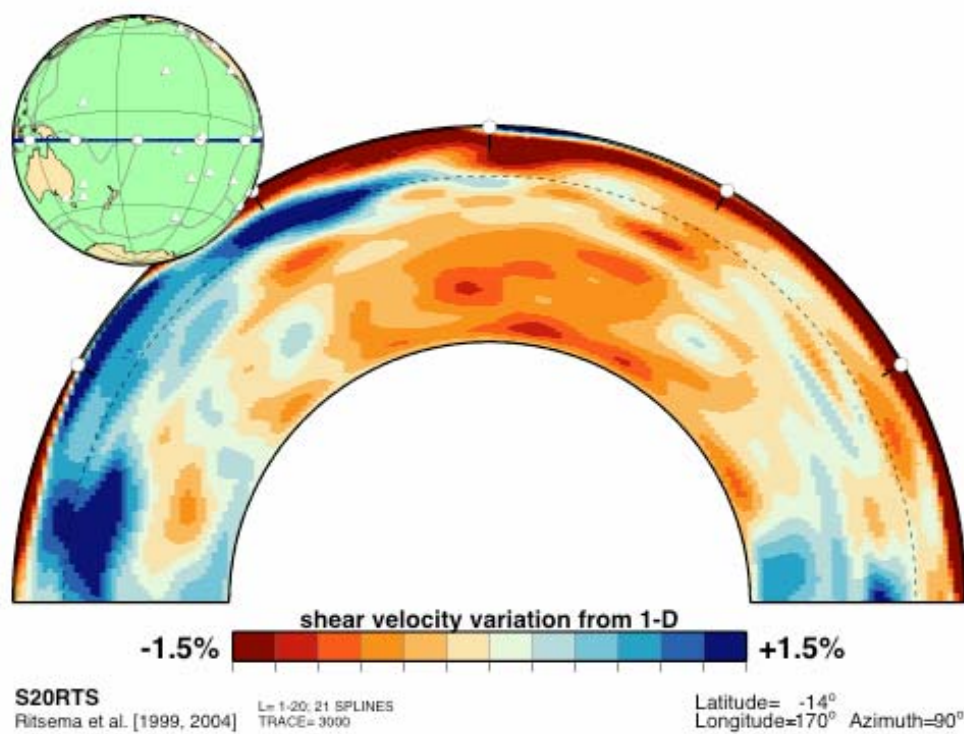

Figure 10c

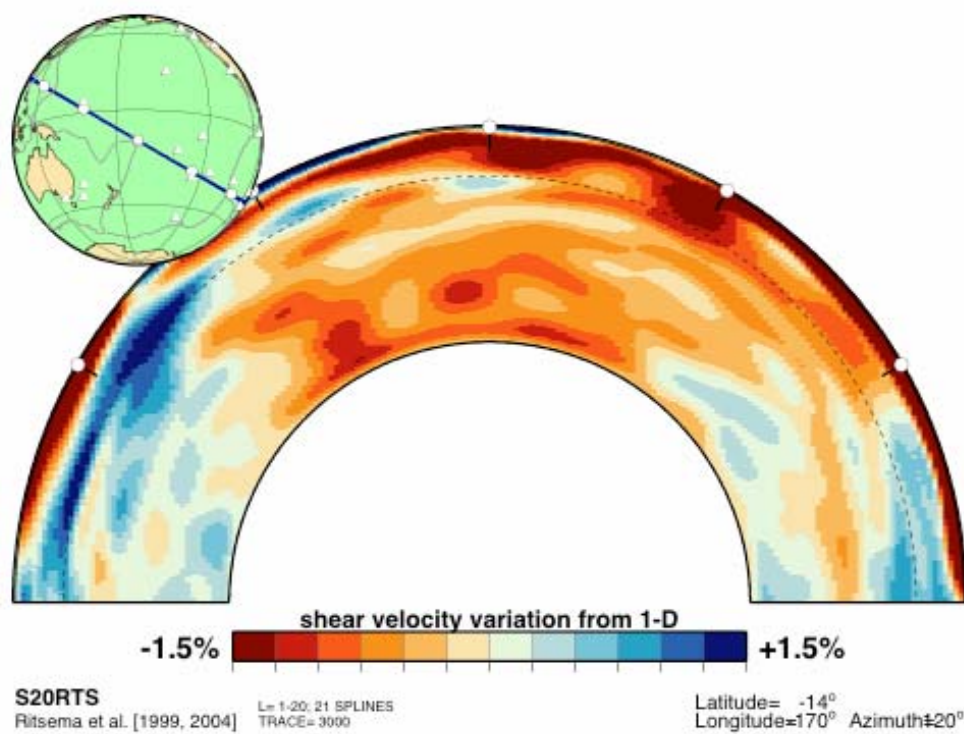

Figure 10d

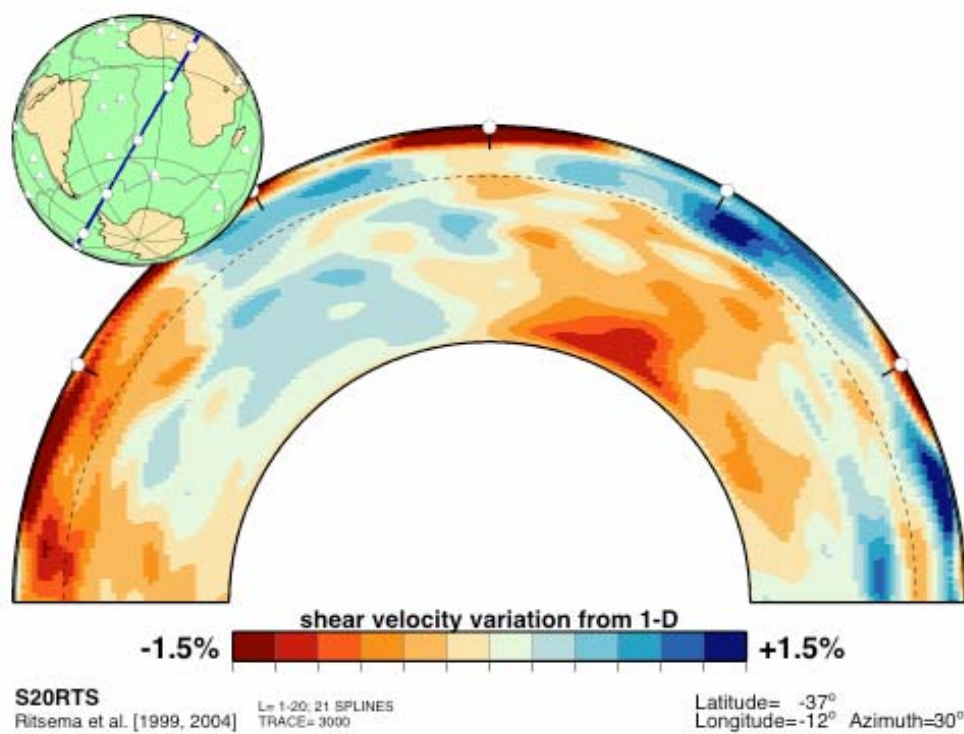

Figure 11a

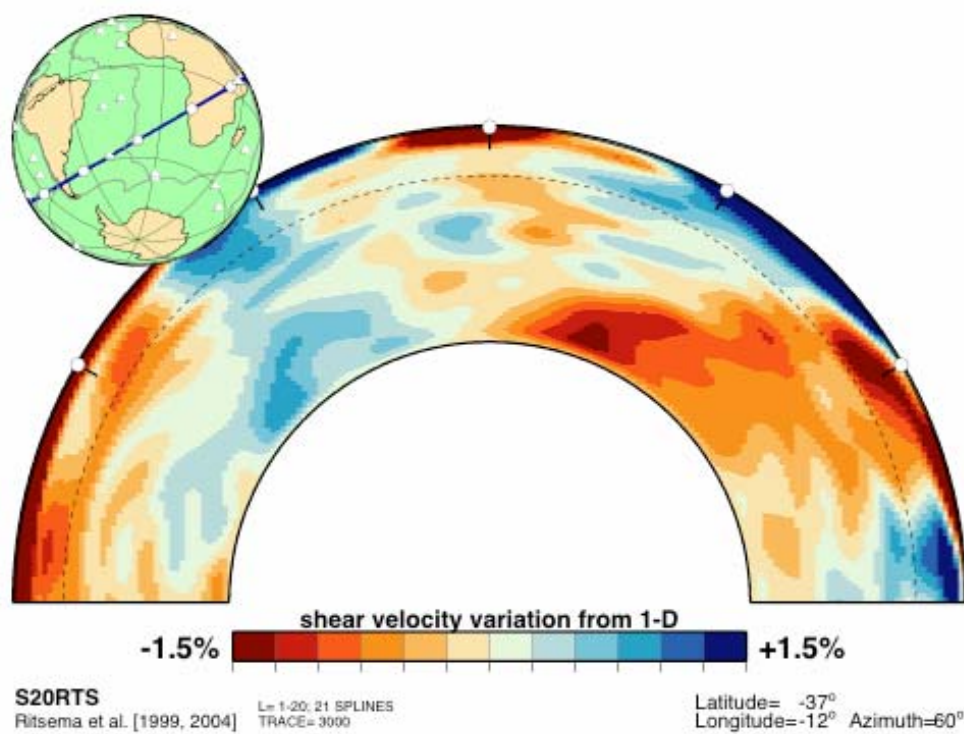

Figure 11b

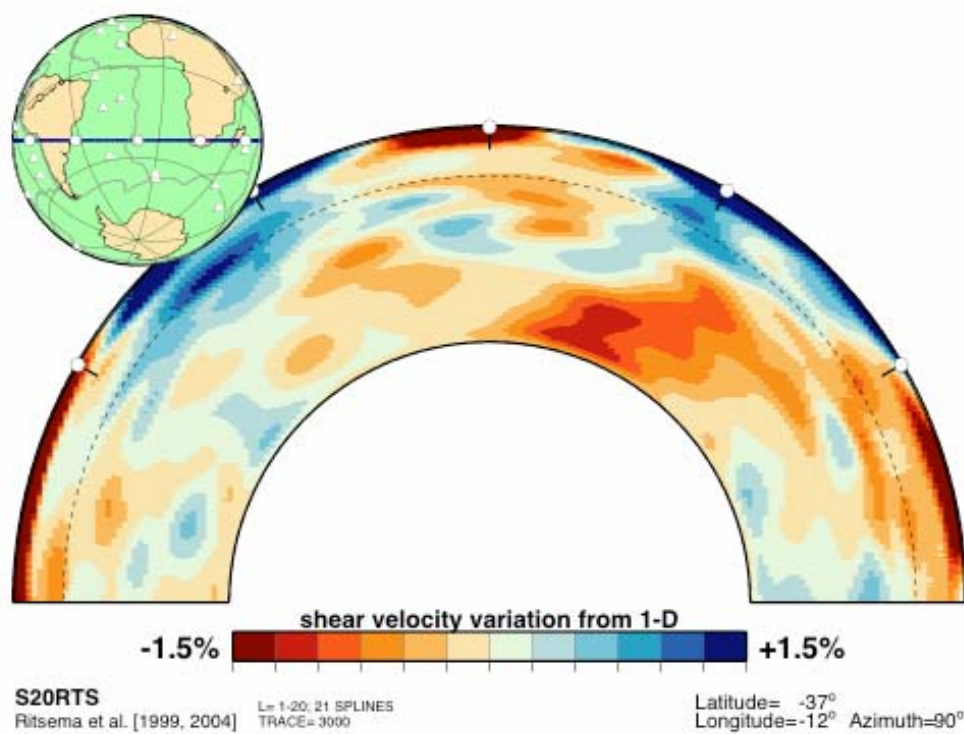

Figure 11c

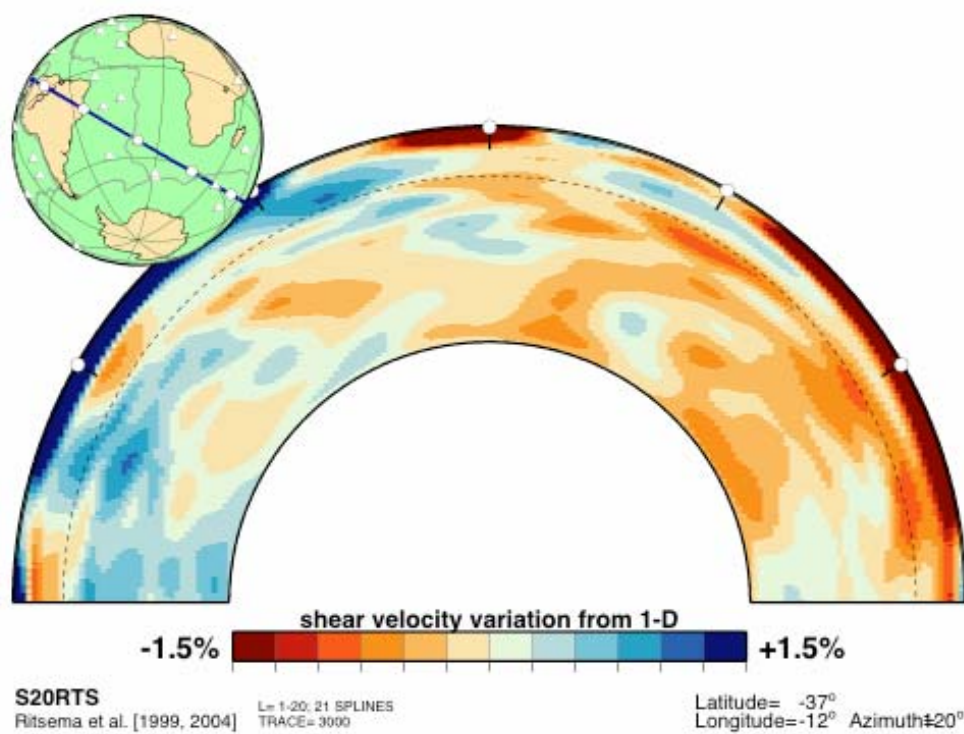

Figure 11d



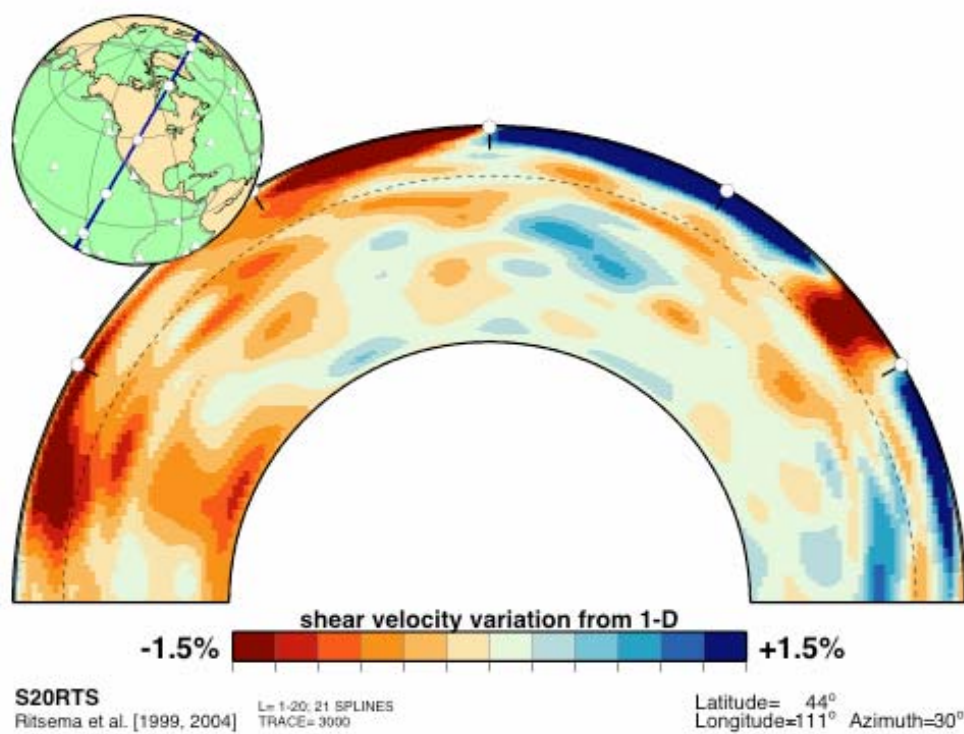

Figure 12a

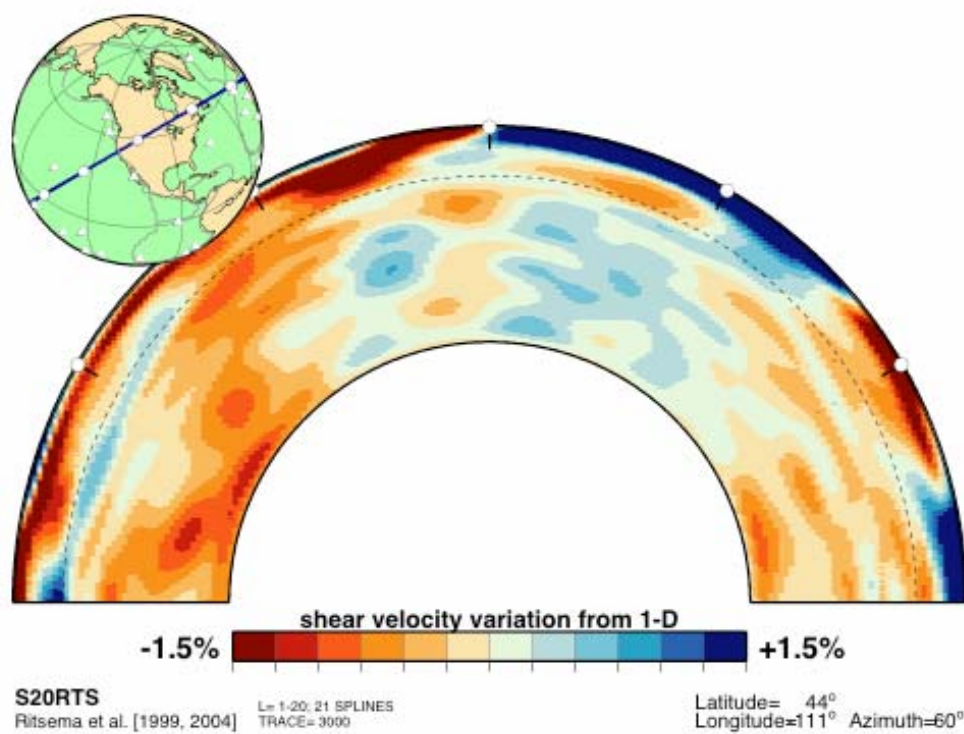

Figure 12b

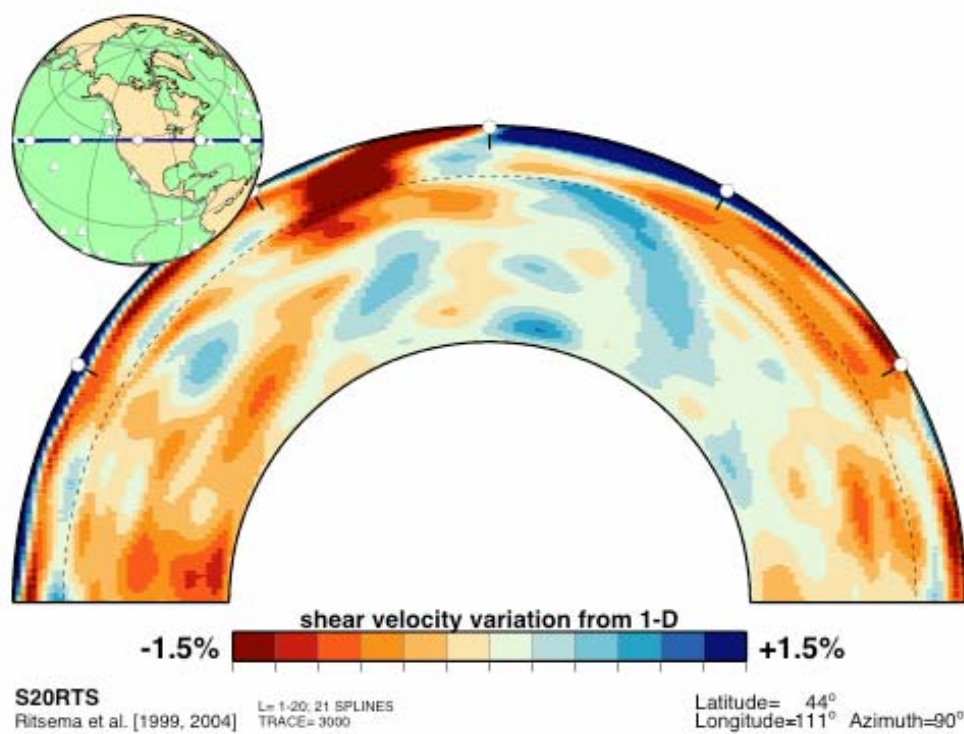

Figure 12c

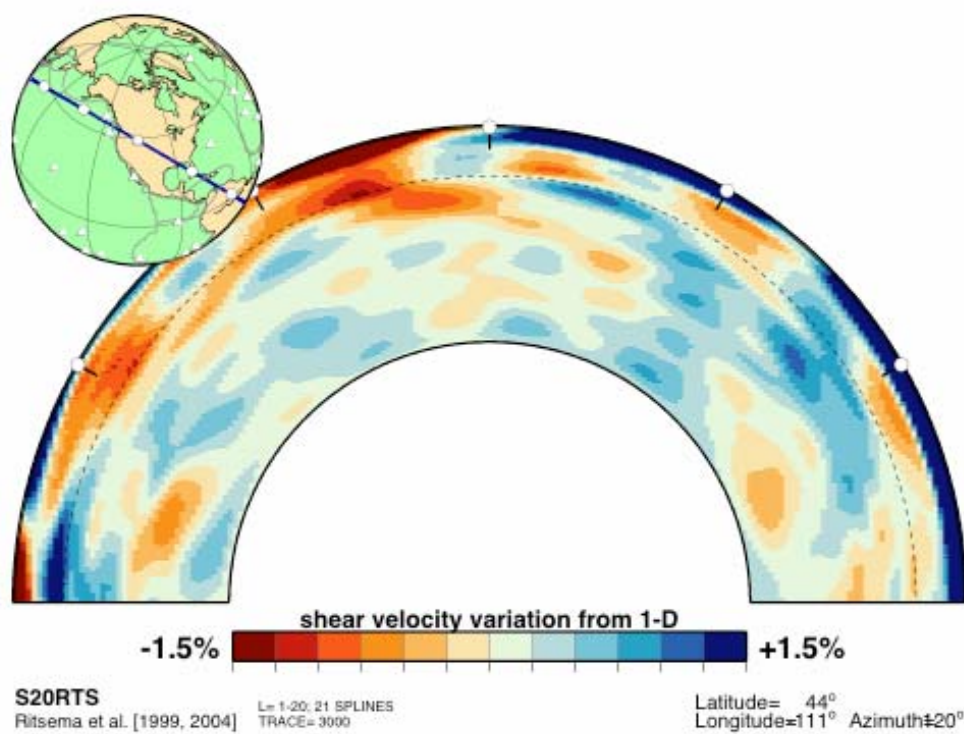

Figure 12d
